# Supplementary material
Source: PubMed Central journal article supplement (PMC4019188)
Supplement: IAI.01528-13_zii999090671so1.pdf [file IAI.01528-13_zii999090671so1.pdf]

## Supplementary Information

Table S1. Bacterial strains and plasmids used in this study.

| Strains or Plasmids | Genotype <sup>a</sup>                                                                                                                                                                                                                              | Source                               |
|---------------------|----------------------------------------------------------------------------------------------------------------------------------------------------------------------------------------------------------------------------------------------------|--------------------------------------|
| <i>E. coli</i>      |                                                                                                                                                                                                                                                    |                                      |
| K12                 | <i>endA1, hsdR17</i> (r <sub>K12</sub> <sup>-</sup> , m <sub>K12</sub> <sup>+</sup> ), <i>supE44, thi-1, recA1, gyrA96, relA1, lacF</i> [ <i>proA</i> <sup>+</sup> <i>B</i> <sup>+</sup> , <i>lac</i> <sup>f</sup> ZDM15::tn10(tet <sup>R</sup> )] | Clontech                             |
| DH5α                | <i>endA1 hsdR17</i> (r <sub>K</sub> <sup>-</sup> m <sub>K</sub> <sup>-</sup> ) <i>supE44 thi-1 recA1 gyrA relA1 Δ(lacZYA-argF)U169 deoR [φ80dlac Δ(lacZ ΔM15)]</i>                                                                                 | Invitrogen                           |
| <i>C. jejuni</i>    |                                                                                                                                                                                                                                                    |                                      |
| AS144               | <i>C. jejuni</i> NCTC 11168                                                                                                                                                                                                                        | National Collection of Type Cultures |
| AS27                | AS144 <i>ΔtonB1::cam</i> <sup>R</sup>                                                                                                                                                                                                              | (1)                                  |
| AS211               | AS144 <i>ΔCj0178::cam</i> <sup>R</sup>                                                                                                                                                                                                             | (2)                                  |
| AS240               | AS144 <i>ΔtonB2::cam</i> <sup>R</sup>                                                                                                                                                                                                              | (1)                                  |
| AS241               | AS144 <i>ΔtonB1+tonB2::cam</i> <sup>R</sup> <i>kan</i> <sup>R</sup>                                                                                                                                                                                | (1)                                  |
| AS242               | AS144 <i>ΔtonB2+tonB3::cam</i> <sup>R</sup> <i>kan</i> <sup>R</sup>                                                                                                                                                                                | (1)                                  |
| AS256               | AS144 <i>Δp19::cam</i> <sup>R</sup>                                                                                                                                                                                                                | This study                           |
| AS260               | AS144 <i>ΔCj1658::cam</i> <sup>R</sup>                                                                                                                                                                                                             | This study                           |
| AS265               | AS144 <i>ΔceuE::cam</i> <sup>R</sup>                                                                                                                                                                                                               | (2)                                  |
| AS269               | AS144 <i>ΔcfrA::cam</i> <sup>R</sup>                                                                                                                                                                                                               | (2)                                  |
| AS287               | AS144 <i>ΔspoT::cam</i> <sup>R</sup>                                                                                                                                                                                                               | (3)                                  |
| AS335               | AS144 <i>ΔchuA::cam</i> <sup>R</sup>                                                                                                                                                                                                               | (4)                                  |
| AS450               | AS144 <i>Δp19+ΔCj1658::cam</i> <sup>R</sup>                                                                                                                                                                                                        | This study                           |
| AS498               | AS144 <i>Δacs::cam</i> <sup>R</sup>                                                                                                                                                                                                                | This study                           |
| AS735               | AS144 <i>ΔtruB::cam</i> <sup>R</sup>                                                                                                                                                                                                               | This study                           |
| AS736               | AS144 <i>ΔCj1340c::cam</i> <sup>R</sup>                                                                                                                                                                                                            | This study                           |
| AS737               | AS144 <i>Δald::cam</i> <sup>R</sup>                                                                                                                                                                                                                | This study                           |
| AS738               | AS144 <i>ΔCj1341c::cam</i> <sup>R</sup>                                                                                                                                                                                                            | This study                           |
| AS739               | AS144 <i>ΔCj0020c::cam</i> <sup>R</sup>                                                                                                                                                                                                            | This study                           |
| AS740               | AS144 <i>ΔCj0358::cam</i> <sup>R</sup>                                                                                                                                                                                                             | This study                           |
| AS741               | AS144 <i>ΔmdaB::cam</i> <sup>R</sup>                                                                                                                                                                                                               | This study                           |
| AS742               | AS144 <i>ΔCj1026c::cam</i> <sup>R</sup>                                                                                                                                                                                                            | This study                           |
| AS743               | AS144 <i>ΔccoQ::cam</i> <sup>R</sup>                                                                                                                                                                                                               | This study                           |
| AS745               | AS144 <i>ΔCj1167::cam</i> <sup>R</sup>                                                                                                                                                                                                             | This study                           |
| AS746               | AS144 <i>ΔpstC::cam</i> <sup>R</sup>                                                                                                                                                                                                               | This study                           |
| AS747               | AS144 <i>ΔCj0073c::cam</i> <sup>R</sup>                                                                                                                                                                                                            | This study                           |
| AS748               | AS144 <i>ΔCj0818::cam</i> <sup>R</sup>                                                                                                                                                                                                             | This study                           |
| AS749               | AS144 <i>ΔCj1613c::cam</i> <sup>R</sup>                                                                                                                                                                                                            | This study                           |
| AS750               | AS144 <i>ΔCj1663::cam</i> <sup>R</sup>                                                                                                                                                                                                             | This study                           |
| AS751               | AS144 <i>ΔflgR::cam</i> <sup>R</sup>                                                                                                                                                                                                               | This study                           |
| AS752               | AS144 <i>ΔCj1377c::cam</i> <sup>R</sup>                                                                                                                                                                                                            | This study                           |
| AS753               | AS144 <i>ΔexbD1::cam</i> <sup>R</sup>                                                                                                                                                                                                              | This study                           |
| AS754               | AS144 <i>ΔCj0045c::cam</i> <sup>R</sup>                                                                                                                                                                                                            | This study                           |
| AS755               | AS144 <i>ΔCj0202c::cam</i> <sup>R</sup>                                                                                                                                                                                                            | This study                           |
| AS756               | AS144 <i>ΔCj0385c::cam</i> <sup>R</sup>                                                                                                                                                                                                            | This study                           |

---

|       |                               |            |
|-------|-------------------------------|------------|
| AS757 | AS144 $\Delta flgH::cam^R$    | This study |
| AS758 | AS144 $\Delta cfbpB::cam^R$   | This study |
| AS759 | AS144 $\Delta Cj1335::cam^R$  | This study |
| AS760 | AS144 $\Delta Cj1036c::cam^R$ | This study |
| AS761 | AS144 $\Delta flhB::cam^R$    | This study |
| AS762 | AS144 $\Delta cfbpA::cam^R$   | This study |
| AS763 | AS144 $\Delta Cj0040::cam^R$  | This study |
| AS764 | AS144 $\Delta flgD::cam^R$    | This study |
| AS765 | AS144 $\Delta flgK::cam^R$    | This study |
| AS766 | AS144 $\Delta Cj0041::cam^R$  | This study |
| AS767 | AS144 $\Delta Cj0416::cam^R$  | This study |
| AS768 | AS144 $\Delta flgE::cam^R$    | This study |
| AS769 | AS144 $\Delta Cj1342c::cam^R$ | This study |
| AS772 | AS144 $\Delta ceuB::cam^R$    | This study |
| AS773 | AS144 $\Delta Cj0494::cam^R$  | This study |
| AS774 | AS144 $\Delta trpF::cam^R$    | This study |
| AS775 | AS144 $\Delta Cj1241::cam^R$  | This study |
| AS776 | AS144 $\Delta Cj0295::cam^R$  | This study |
| AS777 | AS144 $\Delta Cj0524::cam^R$  | This study |
| AS778 | AS144 $\Delta chuB::cam^R$    | This study |
| AS778 | AS144 $\Delta Cj0741::cam^R$  | This study |
| AS779 | AS144 $\Delta Cj1661::cam^R$  | This study |
| AS780 | AS144 $\Delta Cj0148c::cam^R$ | This study |
| AS781 | AS144 $\Delta Cj0554::cam^R$  | This study |
| AS782 | AS144 $\Delta Cj0561::cam^R$  | This study |
| AS783 | AS144 $\Delta Cj1406c::cam^R$ | This study |
| AS784 | AS144 $\Delta Cj0587::cam^R$  | This study |
| AS785 | AS144 $\Delta Cj0819::cam^R$  | This study |
| AS786 | AS144 $\Delta flgM::cam^R$    | This study |
| AS787 | AS144 $\Delta Cj0672::cam^R$  | This study |
| AS789 | AS144 $\Delta Cj1209::cam^R$  | This study |
| AS790 | AS144 $\Delta Cj1356c::cam^R$ | This study |
| AS791 | AS144 $\Delta Cj0786::cam^R$  | This study |
| AS792 | AS144 $\Delta Cj0949c::cam^R$ | This study |
| AS793 | AS144 $\Delta Cj1211::cam^R$  | This study |
| AS794 | AS144 $\Delta Cj0814::cam^R$  | This study |
| AS795 | AS144 $\Delta Cj1242::cam^R$  | This study |
| AS796 | AS144 $\Delta Cj1623::cam^R$  | This study |
| AS797 | AS144 $\Delta flgG::cam^R$    | This study |
| AS798 | AS144 $\Delta exbB2::cam^R$   | This study |
| AS799 | AS144 $\Delta Cj0634::cam^R$  | This study |
| AS800 | AS144 $\Delta cfbpC::cam^R$   | This study |
| AS801 | AS144 $\Delta hypC::cam^R$    | This study |
| AS802 | AS144 $\Delta Cj0260c::cam^R$ | This study |
| AS803 | AS144 $\Delta flgl::cam^R$    | This study |
| AS804 | AS144 $\Delta chuD::cam^R$    | This study |
| AS805 | AS144 $\Delta exbB1::cam^R$   | This study |
| AS806 | AS144 $\Delta Cj1207c::cam^R$ | This study |
| AS807 | AS144 $\Delta flgE2::cam^R$   | This study |
| AS808 | AS144 $\Delta Cj0062c::cam^R$ | This study |
| AS809 | AS144 $\Delta chaN::cam^R$    | This study |

---

---

|        |                                                                  |            |
|--------|------------------------------------------------------------------|------------|
| AS830  | AS144 $\Delta$ <i>flaG</i> ::cam <sup>R</sup>                    | This study |
| AS831  | AS144 $\Delta$ <i>flgG2</i> ::cam <sup>R</sup>                   | This study |
| AS832  | AS144 $\Delta$ Cj0309c::cam <sup>R</sup>                         | This study |
| AS833  | AS144 $\Delta$ Cj1388::cam <sup>R</sup>                          | This study |
| AS940  | AS144 $\Delta$ <i>cmeA</i> ::cam <sup>R</sup>                    | This study |
| AS941  | AS144 $\Delta$ Cj1255::cam <sup>R</sup>                          | This study |
| AS943  | AS144 $\Delta$ Cj0253::cam <sup>R</sup>                          | This study |
| AS959  | AS144 $\Delta$ <i>chuC</i> ::cam <sup>R</sup>                    | This study |
| AS961  | AS786 + <i>flgM</i> ::cam <sup>R</sup> kan <sup>R</sup>          | This study |
| AS962  | AS808 + Cj0062c::cam <sup>R</sup> kan <sup>R</sup>               | This study |
| AS963  | AS809 + <i>chaN</i> ::cam <sup>R</sup> kan <sup>R</sup>          | This study |
| AS964  | AS747 + Cj0073c::cam <sup>R</sup> kan <sup>R</sup>               | This study |
| AS965  | AS794 + Cj0814::cam <sup>R</sup> kan <sup>R</sup>                | This study |
| AS966  | AS796 + Cj1623::cam <sup>R</sup> kan <sup>R</sup>                | This study |
| AS967  | AS742 + Cj1026c::cam <sup>R</sup> kan <sup>R</sup>               | This study |
| AS968  | AS774 + <i>trpF</i> ::cam <sup>R</sup> kan <sup>R</sup>          | This study |
| AS970  | AS803 + <i>flgI</i> ::cam <sup>R</sup> kan <sup>R</sup>          | This study |
| AS971  | AS802 + Cj0260c::cam <sup>R</sup> kan <sup>R</sup>               | This study |
| AS972  | AS760 + Cj1036c::cam <sup>R</sup> kan <sup>R</sup>               | This study |
| AS973  | AS757 + <i>flgH</i> ::cam <sup>R</sup> kan <sup>R</sup>          | This study |
| AS974  | AS144 $\Delta$ Cj0171::cam <sup>R</sup>                          | This study |
| AS975  | AS746 + <i>pstC</i> ::cam <sup>R</sup> kan <sup>R</sup>          | This study |
| AS976  | AS805 + <i>exbB1</i> ::cam <sup>R</sup> kan <sup>R</sup>         | This study |
| AS977  | AS766 + Cj0041::cam <sup>R</sup> kan <sup>R</sup>                | This study |
| AS979  | AS764 + <i>flgE</i> ::cam <sup>R</sup> kan <sup>R</sup>          | This study |
| AS980  | AS765 + $\Delta$ <i>flgK</i> ::cam <sup>R</sup> kan <sup>R</sup> | This study |
| AS981  | AS752 + Cj1377c::cam <sup>R</sup> kan <sup>R</sup>               | This study |
| AS982  | AS751 + <i>flgR</i> ::cam <sup>R</sup> kan <sup>R</sup>          | This study |
| AS983  | AS761 + <i>flhB</i> ::cam <sup>R</sup> kan <sup>R</sup>          | This study |
| AS984  | AS740 + Cj0358::cam <sup>R</sup> kan <sup>R</sup>                | This study |
| AS991  | AS755 + Cj0202c::cam <sup>R</sup> kan <sup>R</sup>               | This study |
| AS992  | AS764 + <i>flgD</i> ::cam <sup>R</sup> kan <sup>R</sup>          | This study |
| AS993  | AS798 + <i>exbB2</i> ::cam <sup>R</sup> kan <sup>R</sup>         | This study |
| AS1014 | AS498 + <i>acs</i> ::cam <sup>R</sup> kan <sup>R</sup>           | This study |
| AS1030 | AS144 $\Delta$ Cj0977::cam <sup>R</sup>                          | This study |
| AS1060 | AS144 $\Delta$ Cj1383c::cam <sup>R</sup>                         | This study |
| AS1061 | AS144 $\Delta$ Cj0344::cam <sup>R</sup>                          | This study |
| AS1062 | AS144 $\Delta$ <i>flgL</i> ::cam <sup>R</sup>                    | This study |
| AS1063 | AS144 $\Delta$ Cj1159c::cam <sup>R</sup>                         | This study |
| AS1064 | AS144 $\Delta$ <i>folP</i> ::cam <sup>R</sup>                    | This study |
| AS1065 | AS144 $\Delta$ <i>exbD2</i> ::cam <sup>R</sup>                   | This study |
| AS1066 | AS144 $\Delta$ Cj0947c::cam <sup>R</sup>                         | This study |
| AS1067 | AS144 $\Delta$ <i>pseB</i> ::cam <sup>R</sup>                    | This study |
| AS1068 | AS144 $\Delta$ Cj0900c::cam <sup>R</sup>                         | This study |
| AS1071 | AS144 $\Delta$ <i>rrc</i> ::cam <sup>R</sup>                     | This study |
| AS1123 | AS1060 + Cj1383c::cam <sup>R</sup> kan <sup>R</sup>              | This study |
| AS1124 | AS1061 + Cj0344::cam <sup>R</sup> kan <sup>R</sup>               | This study |
| AS1125 | AS1066 + Cj0947c::cam <sup>R</sup> kan <sup>R</sup>              | This study |
| AS1126 | AS1071 + <i>rrc</i> ::cam <sup>R</sup> kan <sup>R</sup>          | This study |
| AS1127 | AS1131 + <i>acnB</i> ::cam <sup>R</sup> kan <sup>R</sup>         | This study |
| AS1128 | AS1062 + <i>flgL</i> ::cam <sup>R</sup> kan <sup>R</sup>         | This study |

---

---

|        |                                                                                  |            |
|--------|----------------------------------------------------------------------------------|------------|
| AS1129 | AS1067 + <i>pseB::cam<sup>R</sup>kan<sup>R</sup></i>                             | This study |
| AS1131 | AS144 $\Delta$ <i>acnB::cam<sup>R</sup></i>                                      | This study |
| AS1132 | AS144 $\Delta$ <i>tonB3::cam<sup>R</sup></i>                                     | (1)        |
| AS1133 | AS1132 + <i>tonB3::cam<sup>R</sup>kan<sup>R</sup></i>                            | (1)        |
| AS1330 | AS144 $\Delta$ <i>motAB::cam<sup>R</sup></i>                                     | This study |
| AS1334 | AS144 $\Delta$ <i>ccoQ::kan<sup>R</sup></i>                                      | This study |
| AS1337 | AS144 $\Delta$ <i>ccoQ</i> $\Delta$ <i>flgH::kan<sup>R</sup>cam<sup>R</sup></i>  | This study |
| AS1338 | AS144 $\Delta$ <i>ccoQ</i> $\Delta$ <i>flhB::kan<sup>R</sup>cam<sup>R</sup></i>  | This study |
| AS1339 | AS144 $\Delta$ <i>ccoQ</i> $\Delta$ <i>flgD::kan<sup>R</sup>cam<sup>R</sup></i>  | This study |
| AS1340 | AS144 $\Delta$ <i>ccoQ</i> $\Delta$ <i>motAB::kan<sup>R</sup>cam<sup>R</sup></i> | This study |
| AS1341 | AS1330 + <i>motAB::kan<sup>R</sup>cam<sup>R</sup></i>                            | This study |

### Plasmids

|         |                                                                      |          |
|---------|----------------------------------------------------------------------|----------|
| pRY111  | Cam <sup>R</sup> resistance gene                                     | Yao (5)  |
| pILL600 | Kan <sup>R</sup> resistance gene                                     | Reid (6) |
| pRRK    | Cloning vector used for complementation of mutants, kan <sup>R</sup> | Reid (6) |
| pUC19   | Cloning vector, amp <sup>R</sup>                                     | Biolabs  |

---

<sup>a-</sup> cam<sup>R</sup>, chloramphenicol resistance gene, kan<sup>R</sup>, kanamycin resistance gene, amp<sup>R</sup>, ampicillin resistance gene.

Table S2. Primers used in this study.

| Primer Name         | Primer Sequence (5'- 3') <sup>a</sup>  |
|---------------------|----------------------------------------|
| acs_AS              | CGACTCTAGAGGATCCTCCACGCCCTGTGACAAATCC  |
| acs_AS_inverse      | GAACACCGCCGAGCAGCTCATTAGGTGCATCAGCA    |
| acs_SE              | CGGTACCCGGGGATCCAACGGCTGATGGTGCTTTTCG  |
| acs_SE_inverse      | GAACTAAAGGGGCGCAGGCGAGTCATTGTTTGCTTT   |
| ald_AS              | CGACTCTAGAGGATCCCCATCAGCTCCGCCTATGC    |
| ald_AS_inverse      | GAACACCGCCGAGCATAAAGCAGGTGCCATCTTCC    |
| ald_SE              | CGGTACCCGGGGATCCATGGCAAGAGATGAAAGCACAC |
| ald_SE_inverse      | GAACTAAAGGGGCGCAAGTGTGCAAAGATGCGGATA   |
| ccoQ_AS_cam         | CGACTCTAGAGGATCCCATGACAAGCCGAACACTGAAC |
| ccoQ_AS_inverse_cam | GAACACCGCCGAGCACAAAACATCACGAGTGCAAA    |
| ccoQ_AS_inverse_kan | GTTTCGCTGGGTTTATCCAAAACATCACGAGTGCAAA  |
| ccoQ_SE_cam         | CGGTACCCGGGGATCCGGACCTGATCTTGCTCGTGTAG |
| ccoQ_SE_inverse_cam | GAACTAAAGGGGCGCATGCAAACCTTGCCTTAAAAGA  |
| ccoQ_SE_inverse_kan | GATGTCTAGAAAGCTTTGCAAACCTTGCCTTAAAAGA  |
| ceuB_AS             | CGACTCTAGAGGATCCATTAGCCGCACCAAAAAGAAA  |
| ceuB_AS_inverse     | GAACACCGCCGAGCACTTCACCCATGCCAACTATG    |
| ceuB_SE             | CGGTACCCGGGGATCCATGCAACAACCTCACGCAAAA  |
| ceuB_SE_inverse     | GAACTAAAGGGGCGCATGATTGTAAGCGTTGGGATT   |
| cfbpA_AS            | CGACTCTAGAGGATCCAGCAGAACTCACACCCAAAATC |
| cfbpA_AS_inverse    | GAACACCGCCGAGCATCGCAAACCATTCTTTATCCTT  |
| cfbpA_SE            | CGGTACCCGGGGATCCCTATGCGTTGGCTTTGCTTTTG |
| cfbpA_SE_inverse    | GAACTAAAGGGGCGCAAAGTGGGGAATTCTTTGGGTA  |
| cfbpB_AS            | CGACTCTAGAGGATCCATCCTCTTGCCATAGCTCTAGC |
| cfbpB_AS_inverse    | GAACACCGCCGAGCACCAATAAGCACTTGACCA      |
| cfbpB_SE            | CGGTACCCGGGGATCCTGATTTTGGGTGTGAGTTCTGC |
| cfbpB_SE_inverse    | GAACTAAAGGGGCGCACAGCTTTGCCCTTCTTGT     |
| cfbpC_AS            | CGACTCTAGAGGATCCACAGTAGCCACACGACTTACCC |
| cfbpC_AS_inverse    | GAACACCGCCGAGCACACTCTTTGCGCTTGCTCTC    |
| cfbpC_SE            | CGGTACCCGGGGATCCTGATGCAGCTTTGCCCTTCTTG |
| cfbpC_SE_inverse    | GAACTAAAGGGGCGCAAAAATCAAGGCATTACGGCTA  |
| chuB_AS             | CGACTCTAGAGGATCCTGCTTTTGCCTGAGCCATTTGG |
| chuB_AS_inverse     | GAACACCGCCGAGCATCGCCATTATAATCCGTGGT    |
| chuB_SE             | CGGTACCCGGGGATCCGCTGGGCTTGAATACGCTTGG  |
| chuB_SE_inverse     | GAACTAAAGGGGCGCATGGTTTTCGTGTGGGAATTTT  |
| chuC_AS             | CGACTCTAGAGGATCCGGTGATTTGGCCTAAGGTTGTG |
| chuC_AS_inverse     | GAACACCGCCGAGCATGAGGCACAAAGCCACAAAT    |
| chuC_SE             | CGGTACCCGGGGATCCGCGGACTTATAGGCTTTGTTGG |
| chuC_SE_inverse     | GAACTAAAGGGGCGCAAGCCGTTGTTGCTATCTTGC   |
| chuD_AS             | CGACTCTAGAGGATCCTGGTGCCTTGCTGTTTGGATAC |
| chuD_AS_inverse     | GAACACCGCCGAGCATGAAAAAGTGCCTACGCTTG    |
| chuD_SE             | CGGTACCCGGGGATCCGATGAACCCACTTCAGCCCTTG |
| chuD_SE_inverse     | GAACTAAAGGGGCGCATTAAAGCCCGCAAAGTCAAAT  |
| Cj0012c_AS          | CGACTCTAGAGGATCCATCGCTTTAGCTTTAGCTTCGC |
| Cj0012c_AS_comp     | GGGGAAGCTTTCTAGCACCAAGAGAAAAGCCGTTA    |
| Cj0012c_AS_inverse  | GAACACCGCCGAGCATTTCATTTTCAGCCGCTTCT    |
| Cj0012c_SE          | CGGTACCCGGGGATCCTCGCATCGTTCTCATTGTAAC  |
| Cj0012c_SE_comp     | GATTTAGATGTCTAGAGCAAAGCTTAATTTTTGTGAAA |
| Cj0012c_SE_inverse  | GAACTAAAGGGGCGCATGCAAAAATCGCTGAAGATG   |

---

|                    |                                            |
|--------------------|--------------------------------------------|
| Cj0020c_AS         | CGACTCTAGAGGATCCCGCTTGAACACTTGGATCGTAG     |
| Cj0020c_AS_inverse | GAACACCGCCGAGCAGCCGTGTTGATCAAGCCTAT        |
| Cj0020c_SE         | CGGTACCCGGGGATCCAGAAGAAGCTTAGCGCAGGCATG    |
| Cj0020c_SE_inverse | GAACTAAAGGGCGCAGCATCTCTTGCCATCAAGGT        |
| Cj0040_AS          | CGACTCTAGAGGATCCCGCTCTCATCAAAGCTCCT        |
| Cj0040_AS_inverse  | GAACACCGCCGAGCAAAAAGCTCTAAAAGCTTGAAGCAAAA  |
| Cj0040_SE          | CGGTACCCGGGGATCCCGTTCTACTTCTCCGCCAAA       |
| Cj0040_SE_inverse  | GAACTAAAGGGCGCATGGCAAGAATTTCAAGTGAGC       |
| Cj0041_AS          | CGACTCTAGAGGATCCTGCGTTTTTGTGCTCTTG         |
| Cj0041_AS_comp     | GGGGAAGCTTTCTAGGGTAGCATTGGATTGCTCA         |
| Cj0041_AS_inverse  | GAACACCGCCGAGCATCGTGTTTGTCTTTTGGGA         |
| Cj0041_SE          | CGGTACCCGGGGATCCGAAGCGATGAGCAGACTTCA       |
| Cj0041_SE_comp     | GATTTAGATGTCTAGTGAAGAAAAATTTCTAATGTAATGG   |
| Cj0041_SE_inverse  | GAACTAAAGGGCGCAGAAGAAGATACCACAGATGCTAAAAA  |
| Cj0044c_AS         | CGACTCTAGAGGATCCCAACGGCAAATAGCGGTGATG      |
| Cj0044c_AS_inverse | GAACACCGCCGAGCAAAAATCCATAATTGGCGCTAAAA     |
| Cj0044c_SE         | CGGTACCCGGGGATCCTCCAACCTCAACCTAACCCATC     |
| Cj0044c_SE_inverse | GAACTAAAGGGCGCAAGCCGAAAATATCGGAGAGG        |
| Cj0045c_AS         | CGACTCTAGAGGATCCAGATGGGTTAGGTTGGAGTTGG     |
| Cj0045c_AS_inverse | GAACACCGCCGAGCATCAATCAAAGGAAAATCAATGC      |
| Cj0045c_SE         | CGGTACCCGGGGATCCAAACCCTTCCCAGATAACTGC      |
| Cj0045c_SE_inverse | GAACTAAAGGGCGCATTCTTTGCGTATCCATGCAG        |
| Cj0062c_AS         | CGACTCTAGAGGATCCTTTATCGTAACGGCGTGAAAGC     |
| Cj0062c_AS_comp    | GGGGAAGCTTTCTAGTTGAAGGCAAGCGTTCTTTT        |
| Cj0062c_AS_inverse | GAACACCGCCGAGCATCCACAAACAGTGAAAAATGC       |
| Cj0062c_SE         | CGGTACCCGGGGATCCGCAGCAATCACTGATGCGTATG     |
| Cj0062c_SE_comp    | GATTTAGATGTCTAGGCCCTAGCTTCCAAGCTTTT        |
| Cj0062c_SE_inverse | GAACTAAAGGGCGCATGAAGCCTTTGATATACTGATTTTT   |
| Cj0073c_AS         | CGACTCTAGAGGATCCCCTTGCTTGCAAGTTCACAA       |
| Cj0073c_AS_comp    | GGGGAAGCTTTCTAGTTGGAATTAGTTTATCTAAAAGCACCT |
| Cj0073c_AS_inverse | GAACACCGCCGAGCATTGCGACAATTTTATTGATT        |
| Cj0073c_SE         | CGGTACCCGGGGATCCGCCCTAGAAGCCTTTGCTTT       |
| Cj0073c_SE_comp    | GATTTAGATGTCTAGCGGTACAAAATTTTCGCAAGC       |
| Cj0073c_SE_inverse | GAACTAAAGGGCGCAGCCTTGCACCTAAACTTTGC        |
| Cj0148c_AS         | CGACTCTAGAGGATCCGCGTAGGAATAGAGCGAACACC     |
| Cj0148c_AS_inverse | GAACACCGCCGAGCACAAGCCTTATCTTCCCCTAAAA      |
| Cj0148c_SE         | CGGTACCCGGGGATCCAGCAGGAGCAGGAGGAGAGG       |
| Cj0148c_SE_inverse | GAACTAAAGGGCGCACCCGAGCGTTTGGATAGAAAA       |
| Cj0171_AS          | CGACTCTAGAGGATCCTCGCTAAAGGAATTTGGCAAGG     |
| Cj0171_AS_inverse  | GAACACCGCCGAGCAGCAAGGATCTTTTTCCCAAA        |
| Cj0171_SE          | CGGTACCCGGGGATCCAATGCACGCCCTGCTTATTTAG     |
| Cj0171_SE_inverse  | GAACTAAAGGGCGCAGCTTTTAAAGAAGCTGTGCAAGA     |
| Cj0177_AS          | CGACTCTAGAGGATCCCACGCCCAAACCACTCATACC      |
| Cj0177_AS_comp     | GGGGAAGCTTTCTAGTTTTTTCATTCTCCCCCTTA        |
| Cj0177_AS_inverse  | GAACACCGCCGAGCATCGCCAAGCAGTATCACATC        |
| Cj0177_SE          | CGGTACCCGGGGATCCAGCAAGCAAAGCAAAGCCAAC      |
| Cj0177_SE_comp     | GATTTAGATGTCTAGAAGCAAAGCCAACGCATAGT        |
| Cj0177_SE_inverse  | GAACTAAAGGGCGCAACAGGCGTATGGCTGATGTA        |
| Cj0202c_AS         | CGACTCTAGAGGATCCTTTTCTGCCTAAATGTTCCAAA     |
| Cj0202c_AS_comp    | GGGGAAGCTTTCTAGTTCTGCACGAAAGACAAGA         |
| Cj0202c_AS_inverse | GAACACCGCCGAGCAGCTGCATTTTCAGCAACAAC        |

---

---

|                    |                                           |
|--------------------|-------------------------------------------|
| Cj0202c_SE         | CGGTACCCGGGGATCCAAAACCAAGCCGTTCAAGAAT     |
| Cj0202c_SE_comp    | GATTTAGATGTCTAGAAAACCAAGCCGTTCAAGAAT      |
| Cj0202c_SE_inverse | GAACTAAAGGGCGCAAGCAAAAAGAATGGGTGGTG       |
| Cj0253_AS          | CGACTCTAGAGGATCCGCACTTTTCAGCGTTTTCTTT     |
| Cj0253_AS_inverse  | GAACACCGCCGAGCACGCACTTGAATTGCAATGTTT      |
| Cj0253_SE          | CGGTACCCGGGGATCCCGGCTATAATGGGGGTTAAAA     |
| Cj0253_SE_inverse  | GAACTAAAGGGCGCAAAAAAGATCGTTTGGATATATTTGA  |
| Cj0260c_AS         | CGACTCTAGAGGATCCTTGTGCCGCAGGTGTATTTA      |
| Cj0260c_AS_comp    | GGGGAAGCTTTCTAGCGTGCCTTATATGGCTGGAG       |
| Cj0260c_AS_inverse | GAACACCGCCGAGCACATCAAGAATCAAGCGTCCA       |
| Cj0260c_SE         | CGGTACCCGGGGATCCAAATTTATCTTGGTTGGGCTGA    |
| Cj0260c_SE_comp    | GATTTAGATGTCTAGTGGCATTAAAGTATGAACAAAATCA  |
| Cj0260c_SE_inverse | GAACTAAAGGGCGCAGCATTGGATTTTTAGCTGGTTT     |
| Cj0295_AS          | CGACTCTAGAGGATCCACCATAGCCACGCAAGAAGAAG    |
| Cj0295_AS_inverse  | GAACACCGCCGAGCAGCAAATCAAGCAATTTCTGC       |
| Cj0295_SE          | CGGTACCCGGGGATCCTCAACAGGTGGAGCTAGAAAGC    |
| Cj0295_SE_inverse  | GAACTAAAGGGCGCATGAAATTTACTTTTCGCATCC      |
| Cj0309c_AS         | CGACTCTAGAGGATCCTTTGCTACCAAAATCGTAGGG     |
| Cj0309c_AS_inverse | GAACACCGCCGAGCAGCAACGCTCATAGCGATATTT      |
| Cj0309c_SE         | CGGTACCCGGGGATCCGGCTTCATGTGAATGAAAAATTC   |
| Cj0309c_SE_inverse | GAACTAAAGGGCGCATATGGACAGGAGCTGGAACC       |
| Cj0344_AS          | CGACTCTAGAGGATCCAATCCAGCAAAGTCGCAAAT      |
| Cj0344_AS_comp     | GGGGAAGCTTTCTAGAATCCAGCAAAGTCGCAAAT       |
| Cj0344_AS_inverse  | GAACACCGCCGAGCATTATATTTTATAATTTTTGAAACAT  |
| Cj0344_SE          | CGGTACCCGGGGATCCCATTCCGCTAAAGCTTGCTC      |
| Cj0344_SE_comp     | GATTTAGATGTCTAGACCAATGCCAAAAGTCCAG        |
| Cj0344_SE_inverse  | GAACTAAAGGGCGCAATTTTCATAAAAGTCTTAATTTTTGA |
| Cj0358_AS          | CGACTCTAGAGGATCCAATCGCAGGAGTTGGCATAGG     |
| Cj0358_AS_comp     | GGGGAAGCTTTCTAGCAGCCATTGCTAAACGCATA       |
| Cj0358_AS_inverse  | GAACACCGCCGAGCAAGCAGGAGTTGCCATTTTCAG      |
| Cj0358_SE          | CGGTACCCGGGGATCCTGCTAATCGCATCCTTAGTTGC    |
| Cj0358_SE_comp     | GATTTAGATGTCTAGTTAGCCAAAAGGGATTGAA        |
| Cj0358_SE_inverse  | GAACTAAAGGGCGCATGTTGCTGAAACTGCTCCAT       |
| Cj0385c_AS         | CGACTCTAGAGGATCCTGCTGCGGCTACAAGTAAATCG    |
| Cj0385c_AS_inverse | GAACACCGCCGAGCAAGCCAAAATATCCCCCTTC        |
| Cj0385c_SE         | CGGTACCCGGGGATCCTCACTTTTCATCAAGCCCTCCAC   |
| Cj0385c_SE_inverse | GAACTAAAGGGCGCAAAAACAAGCAGGAGTGGTTGC      |
| Cj0416_AS          | CGACTCTAGAGGATCCGCTGATCCTAGCCCACAAGA      |
| Cj0416_AS_inverse  | GAACACCGCCGAGCATGTCTGCAGAGGATTATTTCCA     |
| Cj0416_SE          | CGGTACCCGGGGATCCTGGGCGCAGATAGAGAAACT      |
| Cj0416_SE_inverse  | GAACTAAAGGGCGCAGAGATGAAAGTATTGAAAATGCAA   |
| Cj0494_AS          | CGACTCTAGAGGATCCTGCAAGGGTAAAAATTCCTGA     |
| Cj0494_AS_inverse  | GAACACCGCCGAGCAAAATTTACTGGGCTTTGTGCTG     |
| Cj0494_SE          | CGGTACCCGGGGATCCTTGCTGCTTCTATGGGCTTT      |
| Cj0494_SE_inverse  | GAACTAAAGGGCGCAAAAAGAACAGCTTCCAAAACG      |
| Cj0524_AS          | CGACTCTAGAGGATCCCGAAGCCGCTAAAACGATGC      |
| Cj0524_AS_inverse  | GAACACCGCCGAGCACGACTAAAACCTATAGCATGAGCA   |
| Cj0524_SE          | CGGTACCCGGGGATCCAGTGTTGGAGGAGTTGTAACGG    |
| Cj0524_SE_inverse  | GAACTAAAGGGCGCACACAACAGCTGAAGGAATTTCA     |
| Cj0554_AS          | CGACTCTAGAGGATCCCGCTCCTATCACTCACACTCAC    |
| Cj0554_AS_inverse  | GAACACCGCCGAGCATTACCAAAAAGCCAGTGAGA       |

---

---

|                    |                                           |
|--------------------|-------------------------------------------|
| Cj0554_SE          | CGGTACCCGGGGATCCTTACTGCTGCTATTGCTTTGCC    |
| Cj0554_SE_inverse  | GAACTAAAGGGCGCATTCAAACCCTGCACACAAA        |
| Cj0561c_AS         | CGACTCTAGAGGATCCAGCTTTTCCGTCTGCATCATTG    |
| Cj0561c_AS_inverse | GAACACCGCCGAGCAAGCCGTAGCTGATTGGGTTA       |
| Cj0561c_SE         | CGGTACCCGGGGATCCAAGGAGTGGCAAGAATTTCTGC    |
| Cj0561c_SE_inverse | GAACTAAAGGGCGCATTCAACCTTGGCAAACAGTG       |
| Cj0587_AS          | CGACTCTAGAGGATCCTGAACAAAACCGCCCGTACTAG    |
| Cj0587_AS_inverse  | GAACACCGCCGAGCAAAAAAGCCCATAAAATGCATAAA    |
| Cj0587_SE          | CGGTACCCGGGGATCCGGAGAAGAGGCAGGTTCTAAGC    |
| Cj0587_SE_inverse  | GAACTAAAGGGCGCATGCCTTAAAATCCGAACAAGA      |
| Cj0634_AS          | CGACTCTAGAGGATCCTGATCCACCCTTAGGAATGC      |
| Cj0634_AS_inverse  | GAACACCGCCGAGCATTGATCTAAACCATTGGCAAAA     |
| Cj0634_SE          | CGGTACCCGGGGATCCCGCAGTAAACTCGCACAAA       |
| Cj0634_SE_inverse  | GAACTAAAGGGCGCATAAGGCTGTTGTGGTTGCAC       |
| Cj0672_AS          | CGACTCTAGAGGATCCTGCCTGTATTTTGCAGAAAGC     |
| Cj0672_AS_inverse  | GAACACCGCCGAGCAGAAGCAAAGCAAAGATAATATCCA   |
| Cj0672_SE          | CGGTACCCGGGGATCCCGGCTGCTTGTATGGGTAT       |
| Cj0672_SE_inverse  | GAACTAAAGGGCGCACGCGGATGATATTTTTACTAGTTTT  |
| Cj0741_AS          | CGACTCTAGAGGATCCTGTGGTTCATTTGCTTCAGGAG    |
| Cj0741_AS_inverse  | GAACACCGCCGAGCACAGCATCTGTTGCCTTGTA        |
| Cj0741_SE          | CGGTACCCGGGGATCCGTGGGTGGCATAGGCAGAC       |
| Cj0741_SE_inverse  | GAACTAAAGGGCGCAGAAAAGCAGTTTGCGGATCT       |
| Cj0786_AS          | CGACTCTAGAGGATCCTGTCTTCTTTGCTCTTCCATGA    |
| Cj0786_AS_inverse  | GAACACCGCCGAGCATCAATTCCAAAAATAACACCAA     |
| Cj0786_SE          | CGGTACCCGGGGATCCATCGTTTTAGGCTTTGGTGA      |
| Cj0786_SE_inverse  | GAACTAAAGGGCGCAAAAAATCAAGATTTAAAAGTGCAAG  |
| Cj0814_AS          | CGACTCTAGAGGATCCATCACCTTCTATGCCACTCTGC    |
| Cj0814_AS_comp     | GGGGAAGCTTTCTAGACAGGTTGTCCACCTTGAGC       |
| Cj0814_AS_inverse  | GAACACCGCCGAGCATCTTGCTAGAGTTTGTGAATTTGC   |
| Cj0814_SE          | CGGTACCCGGGGATCCAAGGGCATTAGGCATTTACGC     |
| Cj0814_SE_comp     | GATTTAGATGTCTAGCAACAAGCATGGGGATTGAT       |
| Cj0814_SE_inverse  | GAACTAAAGGGCGCAGAACGCAATGGATGGACTTT       |
| Cj0818_AS          | CGACTCTAGAGGATCCATGGTTGTAAGCTCAGTTTTAATGG |
| Cj0818_AS_inverse  | GAACACCGCCGAGCAAAACCCAGCACCTACTACCC       |
| Cj0818_SE          | CGGTACCCGGGGATCCTTGAAGTGATTCAAGGCAAG      |
| Cj0818_SE_inverse  | GAACTAAAGGGCGCAAATTGACATGATGGCTGCAA       |
| Cj0819_AS          | CGACTCTAGAGGATCCAGCTATGGGGACGCAAAGTA      |
| Cj0819_AS_inverse  | GAACACCGCCGAGCATTCTTAGGGTCTTGATAGAATAAAAA |
| Cj0819_SE          | CGGTACCCGGGGATCCCCATTTTAGCGCCTTTTCAA      |
| Cj0819_SE_inverse  | GAACTAAAGGGCGCAGTCTTTCTAGGGCGAACAGC       |
| Cj0900c_AS         | CGACTCTAGAGGATCCACAAGCAAACCTCGCCCTCTA     |
| Cj0900c_AS_inverse | GAACACCGCCGAGCACCAAAAACAATCATTAAAAACACAAA |
| Cj0900c_SE         | CGGTACCCGGGGATCCAAAATTACCGGTGTTCTCTCGT    |
| Cj0900c_SE_inverse | GAACTAAAGGGCGCATCAATCATCAATGATGCAAAA      |
| Cj0947c_AS         | CGACTCTAGAGGATCCTTTTAAACCGCTTTGGGAAA      |
| Cj0947c_AS_comp    | GGGGAAGCTTTCTAGAAACGAACAAGAAAAAGAGCAAA    |
| Cj0947c_AS_inverse | GAACACCGCCGAGCACCCCGCTTACATCTTTTTCA       |
| Cj0947c_SE         | CGGTACCCGGGGATCCGGAGCTGAGCTTGTGTTGCTT     |
| Cj0947c_SE_comp    | GATTTAGATGTCTAGTGCAGAACAAGAAAGGCAAA       |
| Cj0947c_SE_inverse | GAACTAAAGGGCGCATTGTTTTGTTTTGGCCCTCAAG     |
| Cj0949c_AS         | CGACTCTAGAGGATCCTCGCACTTGAAAGTACTGCAAC    |

---



---

|                    |                                            |
|--------------------|--------------------------------------------|
| Cj0949c_AS         | CGACTCTAGAGGATCCTCGCACTTGAAAGTACTGCAAC     |
| Cj0949c_AS_inverse | GAACACCGCCGAGCACCAAATCGCGTATCCAAGT         |
| Cj0949c_AS_inverse | GAACACCGCCGAGCACCAAATCGCGTATCCAAGT         |
| Cj0949c_SE         | CGGTACCCGGGGATCCATGCTTTGTCACCCAATGGATG     |
| Cj0949c_SE         | CGGTACCCGGGGATCCATGCTTTGTCACCCAATGGATG     |
| Cj0949c_SE_inverse | GAACTAAAGGGCGCATGAGCATTATTTGCCTTTGC        |
| Cj0949c_SE_inverse | GAACTAAAGGGCGCATGAGCATTATTTGCCTTTGC        |
| Cj0977_AS          | CGACTCTAGAGGATCCAAGGCTATGCTTGGGCTGATAC     |
| Cj0977_AS_inverse  | GAACACCGCCGAGCATCGTCAAAAAGTGCATGAGC        |
| Cj0977_SE          | CGGTACCCGGGGATCCGGCTATGAAGCACCCAAAAGAG     |
| Cj0977_SE_inverse  | GAACTAAAGGGCGCAGTTGTTAGCACCGATGAGCA        |
| Cj1036c_AS         | CGACTCTAGAGGATCCAAGCTTAAATCATAACGCTTCCA    |
| Cj1036c_AS_comp    | GGGGAAGCTTTCTAGGACGCCAACCTCGTTTTATT        |
| Cj1036c_AS_inverse | GAACACCGCCGAGCACTTGCACCACTCTTGCTTGA        |
| Cj1036c_SE         | CGGTACCCGGGGATCCTCCAAGTCCTGGAAAAATAGGA     |
| Cj1036c_SE_comp    | GATTTAGATGTCTAGTGCAATAGCTGCTACGCTTAAA      |
| Cj1036c_SE_inverse | GAACTAAAGGGCGCACAGGATGAATTTTCCGAATTT       |
| Cj1159c_AS         | CGACTCTAGAGGATCCAATGTGCAAAAAGCACTAACAA     |
| Cj1159c_AS_inverse | GAACACCGCCGAGCAGCCTATATGATAAATCACGGGAGA    |
| Cj1159c_SE         | CGGTACCCGGGGATCCTGTGCTTTGCATTCTATCG        |
| Cj1159c_SE_inverse | GAACTAAAGGGCGCATTTATTGCCTAACAGCTCTAAAAA    |
| Cj1167_AS          | CGACTCTAGAGGATCCACCAGGGATTCGTCAGTACATC     |
| Cj1167_AS_inverse  | GAACACCGCCGAGCAGGTGTCATTTGGATTTGTTGC       |
| Cj1167_SE          | CGGTACCCGGGGATCCACCTCAGCTATTCTTCTACGC      |
| Cj1167_SE_inverse  | GAACTAAAGGGCGCAAGAACTCGAAAAAGCCGTGA        |
| Cj1207c_AS         | CGACTCTAGAGGATCCTAATTGCTCAATCGCACCTG       |
| Cj1207c_AS_inverse | GAACACCGCCGAGCATTATTTTACCATTAGCGACTTT      |
| Cj1207c_SE         | CGGTACCCGGGGATCCTTTGCAATGCCCTAAAATCTG      |
| Cj1207c_SE_inverse | GAACTAAAGGGCGCAGCTTTAGGTGGGGTAAATGGA       |
| Cj1209_AS          | CGACTCTAGAGGATCCGCGAATTTCTTCCGGCATTG       |
| Cj1209_AS_inverse  | GAACACCGCCGAGCACTGCAAATTCACCTGCAAAA        |
| Cj1209_SE          | CGGTACCCGGGGATCCAGAACAAGCCAAAGCTAAAGCC     |
| Cj1209_SE_inverse  | GAACTAAAGGGCGCATAACCGAGCAAGCTATGGACA       |
| Cj1211_AS          | CGACTCTAGAGGATCCCCTTTGGGGCTTGGGCTTAG       |
| Cj1211_AS_inverse  | GAACACCGCCGAGCATGGGTGATAATTCTAAGGCTCAA     |
| Cj1211_SE          | CGGTACCCGGGGATCCGCTAGTTTGGCATGGGCTATTG     |
| Cj1211_SE_inverse  | GAACTAAAGGGCGCATTTGCTATGGTTTTACCTGTGC      |
| Cj1241_AS          | CGACTCTAGAGGATCCAGCACCAAGATCAATGTCTTCG     |
| Cj1241_AS_inverse  | GAACACCGCCGAGCATCCTGCTATAAAGCGTGCAA        |
| Cj1241_SE          | CGGTACCCGGGGATCCACTCGCCAAACTTAAACCAAGC     |
| Cj1241_SE_inverse  | GAACTAAAGGGCGCATTGCCTTTTTCAACCATACCTG      |
| Cj1242_AS          | CGACTCTAGAGGATCCTTCTGCTTGACGCATCATCC       |
| Cj1242_AS_inverse  | GAACACCGCCGAGCATTGAAATTCATCTGCCGAAGT       |
| Cj1242_SE          | CGGTACCCGGGGATCCGCCTTTTTCAACCATACCTGCAC    |
| Cj1242_SE_inverse  | GAACTAAAGGGCGCATCAAGCAAATTTACTAACGAAGACA   |
| Cj1255_AS          | CGACTCTAGAGGATCCTTTTTGAATTTGAGATCACTTTCTTG |
| Cj1255_AS_inverse  | GAACACCGCCGAGCACCGTTACTCCTGCGATAAGC        |
| Cj1255_SE          | CGGTACCCGGGGATCCGAAACACTTTTTAATGCAAAATTAGA |
| Cj1255_SE_inverse  | GAACTAAAGGGCGCACGGACTAGGTGGAAAAAGCA        |
| Cj1335_AS          | CGACTCTAGAGGATCCTGCCTTGAAGAGCATCTTTTG      |
| Cj1335_AS_inverse  | GAACACCGCCGAGCATTTTGGGTAGGGGTGAAGGT        |

---

---

|                    |                                              |
|--------------------|----------------------------------------------|
| Cj1335_SE          | CGGTACCCGGGGATCCACCTACAACCTGCACCGAAGG        |
| Cj1335_SE_inverse  | GAACTAAAGGGCGCACAAAAACATTGAGGCTTTAAACAA      |
| Cj1340c_AS         | CGACTCTAGAGGATCCGAGCCGCTTGAGTTGCCTTAG        |
| Cj1340c_AS_inverse | GAACACCGCCGAGCATTGCTCCACCTTCAGTAGCA          |
| Cj1340c_SE         | CGGTACCCGGGGATCCATTGCTCTTGAGTGTGCTACGC       |
| Cj1340c_SE_inverse | GAACTAAAGGGCGCAAGCCTTTGCTTATCGTGGA           |
| Cj1341c_AS         | CGACTCTAGAGGATCCAGTCCTCGCTCATACTCACTG        |
| Cj1341c_AS_inverse | GAACACCGCCGAGCATCATTAAAGATTGAAGCGTTGG        |
| Cj1341c_SE         | CGGTACCCGGGGATCCGAGGATGTCTGGCATAAAGCAG       |
| Cj1341c_SE_inverse | GAACTAAAGGGCGCAATGCAGGCCAAAGGTGAAGTT         |
| Cj1342c_AS         | CGACTCTAGAGGATCCCTAACCAAGGCCAATCTTAGC        |
| Cj1342c_AS_inverse | GAACACCGCCGAGCAACCACAAACACCAAGGCTTC          |
| Cj1342c_SE         | CGGTACCCGGGGATCCAGCGGGGTTGAAAATGTTGATC       |
| Cj1342c_SE_inverse | GAACTAAAGGGCGCATGTATTGGCAATCGTCCTCA          |
| Cj1356c_AS         | CGACTCTAGAGGATCCAGAACGTGCTCAAGGCATACTC       |
| Cj1356c_AS_inverse | GAACACCGCCGAGCACCCGTTAAAGCAAAAAGCAA          |
| Cj1356c_SE         | CGGTACCCGGGGATCCGCAGCGGCCAAATGGAATTAAG       |
| Cj1356c_SE_inverse | GAACTAAAGGGCGCATGTGCTTAGCGTAGGTTTTGG         |
| Cj1377c_AS         | CGACTCTAGAGGATCCACGCAACCATTGCGCCACTTTC       |
| Cj1377c_AS_comp    | GGGGAAGCTTTCTAGCATCGGATTAGGTTTCATTGGA        |
| Cj1377c_AS_inverse | GAACACCGCCGAGCACAAAGCCCCAAATCATAAAGC         |
| Cj1377c_SE         | CGGTACCCGGGGATCCTGTGTATAACCACTCCGCTTGC       |
| Cj1377c_SE_comp    | GATTTAGATGTCTAGTGGAAGTTCTAAATTTGTTTCATC      |
| Cj1377c_SE_inverse | GAACTAAAGGGCGCATTGTTTGGTTGTGGAGGAT           |
| Cj1383c_AS         | CGACTCTAGAGGATCCCACCACTTCCCCAAGTTGAA         |
| Cj1383c_AS_comp    | GGGGAAGCTTTCTAGGCCGCTCCTTCTGTATTTCC          |
| Cj1383c_AS_inverse | GAACACCGCCGAGCATGAAAGTAAAAAGCGTATGTATTAAGC   |
| Cj1383c_SE         | CGGTACCCGGGGATCCGCCGATTCTTGTGATACAGA         |
| Cj1383c_SE_comp    | GATTTAGATGTCTAGGAAGCTAAAAAGCGTAAAATTTCA      |
| Cj1383c_SE_inverse | GAACTAAAGGGCGCATGTTTTGATGCGCAAATTTTA         |
| Cj1388_AS          | CGACTCTAGAGGATCCGTCATAAGTGTAAGTCCAAGCC       |
| Cj1388_AS_inverse  | GAACACCGCCGAGCATCTCCTGAAGCAGGGTTGAT          |
| Cj1388_SE          | CGGTACCCGGGGATCCGCAGTCAAGGGAGAATCTAAAC       |
| Cj1388_SE_inverse  | GAACTAAAGGGCGCACGGTGCTATCTTAGAAGAAAATGG      |
| Cj1406c_AS         | CGACTCTAGAGGATCCATTGACATGAGCGAGCAAGA         |
| Cj1406c_AS_inverse | GAACACCGCCGAGCACACTTGCACCAAAAAGCAAAA         |
| Cj1406c_SE         | CGGTACCCGGGGATCCAGAGCCTTGGAGCTTGTTTAT        |
| Cj1406c_SE_inverse | GAACTAAAGGGCGCAAAAATCGAAAAAGAACTTGATGC       |
| mdaB_AS            | CGACTCTAGAGGATCCCTCCTCCTTTGCCTGCCAAG         |
| mdaB_AS_inverse    | GAACACCGCCGAGCACACCAAGCTGGCATTGATA           |
| mdaB_SE            | CGGTACCCGGGGATCCTGGGTGGAATTTGAGCGTATTC       |
| mdaB_SE_inverse    | GAACTAAAGGGCGCATGGTGTATTGGCATTGTCAT          |
| Cj1613c_AS         | CGACTCTAGAGGATCCTCACTCATCATCAAGCCCAAGC       |
| Cj1613c_AS_inverse | GAACACCGCCGAGCACGTGTTTTTCATCGGCTTTTT         |
| Cj1613c_SE         | CGGTACCCGGGGATCCTCCGCATCTTGTTCAAACCTG        |
| Cj1613c_SE_inverse | GAACTAAAGGGCGCATTGCTCGTATGCACCTTTTG          |
| Cj1658_AS          | ATGC <b>AGATCT</b> GAGGGATTAAGTTTCATAGTAAGGA |
| Cj1658_AS_inverse  | ATGC <b>GGATCC</b> ACCGCTTTTGGAGTTTCTTG      |
| Cj1658_SE          | ATGC <b>AGATCT</b> GCTCAGCTTTTGGTAGGGTAGA    |
| Cj1658_SE_inverse  | ATGC <b>GGATCC</b> GTTTGGCATTGGCTTCTAGG      |
| Cj1661_AS          | CGACTCTAGAGGATCCTGCCTAAAACCAACCCCGCTTG       |

---

---

|                   |                                            |
|-------------------|--------------------------------------------|
| Cj1661_AS_inverse | GAACACCGCCGAGCATAATTTTTCTTCGCCCATGC        |
| Cj1661_SE         | CGGTACCCGGGGATCCAACAACATCACCGCACTTGCTC     |
| Cj1661_SE_inverse | GAACTAAAGGGCGCATGGCACAGCACTTTCTCAA         |
| Cj1663_AS         | CGACTCTAGAGGATCCAACACAGCGTAACGATCATTGG     |
| Cj1663_AS_inverse | GAACACCGCCGAGCATGCTCTTCATCCATTTGCTCT       |
| Cj1663_SE         | CGGTACCCGGGGATCCGCACTGCGTTTAGCCTTGGG       |
| Cj1663_SE_inverse | GAACTAAAGGGCGCATCGCAGATCGAACCCTTATC        |
| cmeA_AS           | CGACTCTAGAGGATCCGGCTTGATCAGGATCTGTACCG     |
| cmeA_AS_inverse   | GAACACCGCCGAGCACATCAAAAGGAGCTTTTATTTG      |
| cmeA_SE           | CGGTACCCGGGGATCCAATGCCGCCTCAACCTGTAAC      |
| cmeA_SE_inverse   | GAACTAAAGGGCGCATGGCTTTAAAGTGCCTCAAAT       |
| exbB1_AS          | CGACTCTAGAGGATCCCTCTGCTTGCTGCGAACTCTTG     |
| exbB1_AS_comp     | GGGGAAGCTTTCTAGGCTGCGAACTCTTGGGTAAT        |
| exbB1_AS_inverse  | GAACACCGCCGAGCATGGTATTTTGCAAACGCAAT        |
| exbB1_SE          | CGGTACCCGGGGATCCCAATTCTGCTCGCGGTGCGTAC     |
| exbB1_SE_comp     | GATTTAGATGTCTAGGCTCGCGGTGCTACTTTTAT        |
| exbB1_SE_inverse  | GAACTAAAGGGCGCAGCAAATCACAGCAAGCAAAA        |
| exbB2_AS          | CGACTCTAGAGGATCCAAATTTTCATGTTCTTTGGCTTTT   |
| exbB2_AS_comp     | GGGGAAGCTTTCTAGCATGCGCAATAAAGGTTGAA        |
| exbB2_AS_inverse  | GAACACCGCCGAGCATCGCATCATCAAATTGCTCT        |
| exbB2_SE          | CGGTACCCGGGGATCCAATCACGCCCTCTTTGGTAA       |
| exbB2_SE_comp     | GATTTAGATGTCTAGGAAGAACAAAAGAGGTAATAATTGTGA |
| exbB2_SE_inverse  | GAACTAAAGGGCGCATTGGCGGGCAATATAGATGT        |
| exbD1_AS          | CGACTCTAGAGGATCCTAGCGGAGCACTGAGCGATTG      |
| exbD1_AS_inverse  | GAACACCGCCGAGCAGCTGCGAACTCTTGGGTAAT        |
| exbD1_SE          | CGGTACCCGGGGATCCAAATGGCTTGAGTTTGCTTGCG     |
| exbD1_SE_inverse  | GAACTAAAGGGCGCAAACCAAAGGCAATAAAGAAGAAA     |
| exbD2_AS          | CGACTCTAGAGGATCCTTGGTATTGGGTGTGGAGGT       |
| exbD2_AS_inverse  | GAACACCGCCGAGCACATGCGCAATAAAGGTTGAA        |
| exbD2_SE          | CGGTACCCGGGGATCCTGGCATTATAGCTTTTTGGTG      |
| exbD2_SE_inverse  | GAACTAAAGGGCGCACACTTCTTCAAGTGAAAATGC       |
| flaG_AS           | CGACTCTAGAGGATCCAGACTTGCTGGAGGATTATCGC     |
| flaG_AS_inverse   | GAACACCGCCGAGCATCGCCTTCTTGACCTTGACT        |
| flaG_SE           | CGGTACCCGGGGATCCTATATGCTTGTGGCGTGTGG       |
| flaG_SE_inverse   | GAACTAAAGGGCGCAACAGCAACGAGGTGTGAGTG        |
| flgD_AS           | CGACTCTAGAGGATCCCCGCTACCATAACCACCTTGAG     |
| flgD_AS_comp      | GGGGAAGCTTTCTAGAAAGCCCGTGGTATTGACAT        |
| flgD_AS_inverse   | GAACACCGCCGAGCAGGTAGCATTGGATTGCTCA         |
| flgD_SE           | CGGTACCCGGGGATCCCAACTCCAATGCCAATGCAATG     |
| flgD_SE_comp      | GATTTAGATGTCTAGGAGCAAATCAAATCAAGGAAA       |
| flgD_SE_inverse   | GAACTAAAGGGCGCACTATGGAGTGGCCAGGAAGA        |
| flgE_AS           | CGACTCTAGAGGATCCATCACCGCTATTTGCCGTTGC      |
| flgE_AS_comp      | GGGGAAGCTTTCTAGGCGAAAGCGACATAGAAGAAA       |
| flgE_AS_inverse   | GAACACCGCCGAGCACCCATAAGCCCAGCAACTCT        |
| flgE_SE           | CGGTACCCGGGGATCCCAAGTGGTGGTTCAAGCGATGG     |
| flgE_SE_comp      | GATTTAGATGTCTAGTATGCAAAAATGGCTGGACA        |
| flgE_SE_inverse   | GAACTAAAGGGCGCAACCGCAAGAAGGCGATAATA        |
| flgE2_AS          | CGACTCTAGAGGATCCTGCAGGTTTCAAGTACACGGATG    |
| flgE2_AS_inverse  | GAACACCGCCGAGCAGGATATGCATACCTGGATCG        |
| flgE2_SE          | CGGTACCCGGGGATCCTCTGGCGTAAGCGGACTACAAG     |
| flgE2_SE_inverse  | GAACTAAAGGGCGCAGCAGCTTATTGGGATGCTGT        |

---

---

|                  |                                              |
|------------------|----------------------------------------------|
| flgG_AS          | CGACTCTAGAGGATCCAACCATTCTGTGGGTCCTATG        |
| flgG_AS_inverse  | GAACACCGCCGAGCAACCCATTACCTGCAATAGCC          |
| flgG_SE          | CGGTACCCGGGGATCCACTCCAATGCTATTCGCCAAGG       |
| flgG_SE_inverse  | GAACTAAAGGGCGCACAAGATGGGCTTGAACAAT           |
| flgG2_AS         | CGACTCTAGAGGATCCCGCTGTTGGACGCACACC           |
| flgG2_AS_inverse | GAACACCGCCGAGCAGTCATTGCCAAATCCAAAGG          |
| flgG2_SE         | CGGTACCCGGGGATCCAAGGTAAGCGGTGGTTACGATG       |
| flgG2_SE_inverse | GAACTAAAGGGCGCACAATGCTATTCGCCAAGGTT          |
| flgH_AS          | CGACTCTAGAGGATCCTCATGTCCAACCTTGCGGTAGG       |
| flgH_AS_comp     | GGGGAAGCTTTCTAGTGCTTTAGGCGAAGCTAAGG          |
| flgH_AS_inverse  | GAACACCGCCGAGCATTGCTTTGTTTTGGTGCAAG          |
| flgH_SE          | CGGTACCCGGGGATCCTCCTCCATTGCCTCTCTAAAGG       |
| flgH_SE_comp     | GATTTAGATGTCTAGTGCCATCATTTTTCTCCTTGA         |
| flgH_SE_inverse  | GAACTAAAGGGCGCACAACGGAGAGAAGCAAATCA          |
| flgl_AS          | CGACTCTAGAGGATCCTTTCATCGCTGGCATCTTTTCC       |
| flgl_AS_comp     | GGGGAAGCTTTCTAGTGGCTGCACGATCAAGTAAA          |
| flgl_AS_inverse  | GAACACCGCCGAGCATACTGTGCGAGAGTCGATGG          |
| flgl_SE          | CGGTACCCGGGGATCCCAGCCAAACTTCCAGCCTTTG        |
| flgl_SE_comp     | GATTTAGATGTCTAGCAACCATAAAAACTCCCGAAA         |
| flgl_SE_inverse  | GAACTAAAGGGCGCAGGAACAGTGATTGCTGGA            |
| flgK_AS          | CGACTCTAGAGGATCCAGGGCGGCTAATTCTTCATTTG       |
| flgK_AS_comp     | GGGGAAGCTTTCTAGGCAATTTGCAAAGGATCTGG          |
| flgK_AS_inverse  | GAACACCGCCGAGCATGCGTGTTCTGTTGGTAAGG          |
| flgK_SE          | CGGTACCCGGGGATCCAACAGGTGGAGTTCAAGTAGGC       |
| flgK_SE_comp     | GATTTAGATGTCTAGTGATGGAACAAATAATGCTTATGG      |
| flgK_SE_inverse  | GAACTAAAGGGCGCATATCATGCGCCAAATCAATG          |
| flgL_AS          | CGACTCTAGAGGATCCCCCATTCTCCCATGCCAGGTG        |
| flgL_AS_comp     | GGGGAAGCTTTCTAGAAGCGTGGAGCTGGTAAAAA          |
| flgL_AS_inverse  | GAACACCGCCGAGCAACCCCACTATTTCCAGTTGC          |
| flgL_SE          | CGGTACCCGGGGATCCTCCAAGCAGCACAGGATGAAGG       |
| flgL_SE_comp     | GATTTAGATGTCTAGTTTTTGAACAGTTATTGCTTTTTG      |
| flgL_SE_inverse  | GAACTAAAGGGCGCAGAGAGCAGACTCCGAAAGTGA         |
| flgM_AS          | CGACTCTAGAGGATCCGCCATCAAGAAAATCTTTGACA       |
| flgM_AS_comp     | GGGGAAGCTTTCTAGTTCCGCGATAAGTTTTGTTTT         |
| flgM_AS_inverse  | GAACACCGCCGAGCATTTTTTGAGTATCGTTTTGTTTTAGTTTC |
| flgM_SE          | CGGTACCCGGGGATCCGCAGCCAAAGCAAGAAGTTT         |
| flgM_SE_comp     | GATTTAGATGTCTAGAAAAGATGCCAGCGATGAAA          |
| flgM_SE_inverse  | GAACTAAAGGGCGCAAGCGAGTAAAATCGCAGAGC          |
| flgP_AS          | CGACTCTAGAGGATCCATTCTACGGTAAAACGCAAGGG       |
| flgP_AS_comp     | GGGGAAGCTTTCTAGACATTTTCGCTTTGCGTCAT          |
| flgP_AS_inverse  | GAACACCGCCGAGCAAGCATCTGGAGCCAACATTT          |
| flgP_SE          | CGGTACCCGGGGATCCGCAAAGCAGAGGTGGTAAGGG        |
| flgP_SE_comp     | GATTTAGATGTCTAGAGGGCGTAATACGAGTGGTG          |
| flgP_SE_inverse  | GAACTAAAGGGCGCATGCGCAAGTAAATGGTTTTGA         |
| flgR_AS          | CGACTCTAGAGGATCCGCACCAGTAGCACCCACAATG        |
| flgR_AS_comp     | GGGGAAGCTTTCTAGCACCCAGTAGCACCCACAATG         |
| flgR_AS_inverse  | GAACACCGCCGAGCAGCCATCAATTCCTGGCATA           |
| flgR_SE          | CGGTACCCGGGGATCCATCCTTAGCAATGACGCAAAGC       |
| flgR_SE_comp     | GATTTAGATGTCTAGTTTACCCTTGCGTTTTACCG          |
| flgR_SE_inverse  | GAACTAAAGGGCGCAAATGGCGAATTTGTTTCAG           |
| flhB_AS          | CGACTCTAGAGGATCCGCCTACCAAAGAGCGGAAAATG       |

---

---

|                     |                                          |
|---------------------|------------------------------------------|
| flhB_AS_comp        | GGGGAAGCTTTCTAGAAGGTGGAGCAAATTTGAAAA     |
| flhB_AS_inverse     | GAACACCGCCGAGCAAATAGCTGCCGCATCTTGAG      |
| flhB_SE             | CGGTACCCGGGGATCCCGTTCTTGCTTGATGCTGATGG   |
| flhB_SE_comp        | GATTTAGATGTCTAGCCTAAAGGCGTGGCTGAATA      |
| flhB_SE_inverse     | GAACTAAAGGGCGCAGTGGATTTCTCGCTCTTCG       |
| folP_AS             | CGACTCTAGAGGATCCCTTCGCCATCGCCCCTAGTG     |
| folP_AS_inverse     | GAACACCGCCGAGCACTCACTCCCAGGTCTTGAGC      |
| folP_SE             | CGGTACCCGGGGATCCAGCGGGGTGCTTTTAGCTACTC   |
| folP_SE_inverse     | GAACTAAAGGGCGCATGCGTATTTTCAAAGCGAGA      |
| hypC_AS             | CGACTCTAGAGGATCCTCCAAAACCTCAAGTGGAGAA    |
| hypC_AS_inverse     | GAACACCGCCGAGCATCGCCTTGTTTTAAAGGTTCA     |
| hypC_SE             | CGGTACCCGGGGATCCAGCTGTCATTTGGACGCTTT     |
| hypC_SE_inverse     | GAACTAAAGGGCGCACATGTAGGCGTTGCTATGGA      |
| motAmotB_AS         | CGACTCTAGAGGATCCATAAGCTCAAGAACCGATTTTTGA |
| motAmotB_AS_comp    | GGGGAAGCTTTCTAGGCTGTAGCTGAGGTGCTAGG      |
| motAmotB_AS_inverse | GAACACCGCCGAGCA TGCTCTTCAAGTTGTTCCGGT    |
| motAmotB_SE         | CGGTACCCGGGGATCCAGGAATGGTGCTTGCAGTTACT   |
| motAmotB_SE_comp    | GATTTAGATGTCTAGTGAAGTAAAAGACGATTTGTGTGA  |
| motAmotB_SE_inverse | GAACTAAAGGGCGCA AGCGATAATCAGGTTGCTCTT    |
| P19_AS              | ATGC <b>AGATCT</b> AAACAAGCAAGGCTAAAGCAA |
| P19_AS_inverse      | ATGC <b>GGATCC</b> GACGCCATGTTGATGAAGAA  |
| P19_SE              | ATGC <b>AGATCT</b> GGCTACTTTCAAACGCACAA  |
| P19_SE_inverse      | ATGC <b>GGATCC</b> ACCTCTTGGCTCCATTTCAA  |
| pseB_AS             | CGACTCTAGAGGATCCGCATTAGCTGTAGCGGCAAAGG   |
| pseB_AS_comp        | GGGGAAGCTTTCTAGTCGCTTTGATCGATGTTTTG      |
| pseB_AS_inverse     | GAACACCGCCGAGCATAACACCAAAGCGTGTTCG       |
| pseB_SE             | CGGTACCCGGGGATCCTCAAGCCCAAACCTGGCATAACC  |
| pseB_SE_comp        | GATTTAGATGTCTAGAGGCAAGTATCAAGCCCAA       |
| pseB_SE_inverse     | GAACTAAAGGGCGCAGCCCATGCTCTAGCTCCTAA      |
| pstC_AS             | CGACTCTAGAGGATCCAGAAGCTGCCATCACCCTATC    |
| pstC_AS_comp        | GGGGAAGCTTTCTAGTGCTTAAAGCAGGAAATCCA      |
| pstC_AS_inverse     | GAACACCGCCGAGCAGCTGCCCACTGACTTGAGA       |
| pstC_SE             | CGGTACCCGGGGATCCGTGTTACGCCAAGCGAAGAAAG   |
| pstC_SE_comp        | GATTTAGATGTCTAGTGATTTGGCAAAAAGTGGTG      |
| pstC_SE_inverse     | GAACTAAAGGGCGCAGCAGATGGCACGAGTAAACA      |
| trpF_AS             | CGACTCTAGAGGATCCGCAAGCCCGTGTGGACCTG      |
| trpF_AS_comp        | GGGGAAGCTTTCTAGCATTGCACTTTCAGGCAAAA      |
| trpF_AS_inverse     | GAACACCGCCGAGCATCCATTACCGCCCTTTAAAT      |
| trpF_SE             | CGGTACCCGGGGATCCACAGCCAATAAAGCAAGTTCGC   |
| trpF_SE_comp        | GATTTAGATGTCTAGGTAGAATGCAAGGGGCAAAA      |
| trpF_SE_inverse     | GAACTAAAGGGCGCAATTAGCCGGAGGCATAGGTT      |
| truB_AS             | CGACTCTAGAGGATCCTGTCAACAAGCTCAAGCTCATC   |
| truB_AS_inverse     | GAACACCGCCGAGCATTGGCGAAAGGATCAAGAGT      |
| truB_SE             | CGGTACCCGGGGATCCCCGTCTTGCTTATGTTGCCATC   |
| truB_SE_inverse     | GAACTAAAGGGCGCAAGCGCATTAAAGAAGGCAAA      |
| ak233-SE            | GCAAGAGTTTTGCTTATGTTAGCAG                |
| ak234-SE            | GAAATGGGCAGAGTGTATTCTCCG                 |
| ak235-SE            | GTGCGGATAATGTTGTTTCTG                    |
| AR56-AS             | CATCCTCTTCGTCTTGGTAGC                    |
| Cat-AS              | TGCGCCCTTTAGTTCCCTAAAGGGT                |
| Cat-SE              | TGCTCGGCGGTGTTCCCTTTCCAAG                |

---

---

|        |                        |
|--------|------------------------|
| Kan-AS | AAGCTTTCTAGACATCTAAATC |
| Kan-SE | GATAAACCCAGCGAACCATT   |

---

<sup>a</sup> Restriction sites in bold.

Table S3. Genes selected for isogenic deletion mutant construction. Significantly differentially expressed genes from microarray analysis upon oxidant exposure or in a  $\Delta perR$  background were targeted for deletion in *C. jejuni*. Genes successfully deleted are presented. Genes were attempted to be deleted at least 3 times.

| Gene name      | Microarray analysis <sup>a</sup> (condition assayed <sup>b</sup> ) |     |     |               | Mutant constructed? |
|----------------|--------------------------------------------------------------------|-----|-----|---------------|---------------------|
|                | H <sub>2</sub> O <sub>2</sub>                                      | CHP | MND | $\Delta perR$ |                     |
| <i>cj0416</i>  | + <sup>c</sup>                                                     | +   | +   | +             | Yes                 |
| <i>mdaB</i>    | +                                                                  | +   | +   | +             | Yes                 |
| <i>rpmF</i>    | +                                                                  | +   | +   | +             | No                  |
| <i>cj1485c</i> | +                                                                  | +   | +   | +             | No                  |
| <i>cj0672</i>  | +                                                                  | +   | +   | +             | Yes                 |
| <i>cj0148c</i> | +                                                                  | +   | +   | +             | Yes                 |
| <i>cj0202c</i> | +                                                                  | +   | +   | +             | Yes                 |
| <i>cj0344</i>  | +                                                                  | +   | +   | +             | Yes                 |
| <i>maf4</i>    | +                                                                  | +   | +   | +             | Yes                 |
| <i>cj0176c</i> | +                                                                  | +   | +   | +             | No                  |
| <i>cj0819</i>  | +                                                                  | +   | +   | +             | Yes                 |
| <i>cj0253</i>  | +                                                                  | +   | +   | +             | Yes                 |
| <i>folP</i>    | +                                                                  | +   | +   | +             | Yes                 |
| <i>cj0877c</i> | +                                                                  | +   |     | +             | No                  |
| <i>cj0295</i>  | +                                                                  | +   |     | +             | Yes                 |
| <i>cj0524</i>  | +                                                                  | +   |     | +             | Yes                 |
| <i>ald</i>     | +                                                                  |     | +   | +             | Yes                 |
| <i>cj1534c</i> | +                                                                  |     | +   | +             | No                  |
| <i>cj0988c</i> | +                                                                  |     | +   | +             | No                  |
| <i>cj1241</i>  | +                                                                  |     |     | +             | Yes                 |
| <i>flaG</i>    | +                                                                  |     |     | +             | Yes                 |
| <i>cj0878</i>  | +                                                                  |     |     | +             | No                  |
| <i>cj1388</i>  | +                                                                  |     |     | +             | Yes                 |
| <i>cj1383c</i> | - <sup>d</sup>                                                     | -   | -   | +             | Yes                 |
| <i>chuC</i>    | -                                                                  | -   | -   | +             | Yes                 |
| <i>chuD</i>    | -                                                                  | -   |     | +             | Yes                 |
| <i>aroC</i>    | -                                                                  | -   |     | +             | No                  |
| <i>chuB</i>    | -                                                                  | -   |     | +             | Yes                 |
| <i>flhB</i>    | -                                                                  |     | -   | +             | Yes                 |
| <i>cfbpB</i>   | -                                                                  |     |     | +             | Yes                 |
| <i>chaN</i>    | -                                                                  |     |     | +             | Yes                 |
| <i>exbB1</i>   | -                                                                  |     |     | +             | Yes                 |

---

|                |   |   |   |   |     |
|----------------|---|---|---|---|-----|
| <i>cj1386</i>  | - |   |   | + | Yes |
| <i>cj1710c</i> | - |   |   | + | No  |
| <i>cj0135</i>  |   | + | + | + | No  |
| <i>cj0260c</i> |   | + | + | + | Yes |
| <i>cj1667c</i> |   | + | + | + | No  |
| <i>cj1159c</i> |   | + |   | + | Yes |
| <i>cj0554</i>  |   | + |   | + | Yes |
| <i>cj1714</i>  |   | + |   | + | No  |
| <i>grpE</i>    |   | + |   | + | No  |
| <i>chuA</i>    |   | - |   | + | Yes |
| <i>cj0786</i>  |   |   | + | + | Yes |
| <i>rpmJ</i>    |   |   | + | + | No  |
| <i>cj1558</i>  |   |   | + | + | No  |
| <i>tonB2</i>   |   |   | - | + | Yes |
| <i>fliK</i>    |   |   | - | + | Yes |
| <i>exbD2</i>   |   |   | - | + | Yes |
| <i>exbD1</i>   |   |   |   | + | Yes |
| <i>cj1658</i>  |   |   |   | + | Yes |
| <i>chuZ</i>    |   |   |   | + | Yes |
| <i>cj1661</i>  |   |   |   | + | Yes |
| <i>tonB3</i>   |   |   |   | + | Yes |
| <i>exbB2</i>   |   |   |   | + | Yes |
| <i>p19</i>     |   |   |   | + | Yes |
| <i>cfbpA</i>   |   |   |   | + | Yes |
| <i>ceuC</i>    |   |   |   | + | No  |
| <i>cj1384c</i> |   |   |   | + | No  |
| <i>trxB</i>    |   |   |   | + | No  |
| <i>cfrA</i>    |   |   |   | + | Yes |
| <i>cj0818</i>  |   |   |   | + | Yes |
| <i>cj0040</i>  |   |   |   | + | Yes |
| <i>cj0045c</i> |   |   |   | + | Yes |
| <i>flgD</i>    |   |   |   | + | Yes |
| <i>flgK</i>    |   |   |   | + | Yes |
| <i>cj0587</i>  |   |   |   | + | Yes |
| <i>cj1664</i>  |   |   |   | + | No  |
| <i>pstC</i>    |   |   |   | + | Yes |
| <i>cj1295</i>  |   |   |   | + | No  |
| <i>flgE</i>    |   |   |   | + | Yes |
| <i>flgL</i>    |   |   |   | + | Yes |
| <i>pstS</i>    |   |   |   | + | No  |
| <i>cj1663</i>  |   |   |   | + | Yes |
| <i>cj0062c</i> |   |   |   | + | Yes |
| <i>cj0814</i>  |   |   |   | + | Yes |

---



---

|                |   |   |   |   |     |
|----------------|---|---|---|---|-----|
| <i>flgC</i>    |   |   |   | + | No  |
| <i>cj0428</i>  |   |   |   | + | No  |
| <i>flgP</i>    |   |   |   | + | Yes |
| <i>pseB</i>    |   |   |   | + | Yes |
| <i>flgI</i>    |   |   |   | + | Yes |
| <i>asd</i>     |   |   |   | + | No  |
| <i>flgB</i>    |   |   |   | + | No  |
| <i>flgH</i>    |   |   |   | + | Yes |
| <i>cj1294</i>  |   |   |   | + | No  |
| <i>flgG</i>    |   |   |   | + | Yes |
| <i>flgG2</i>   |   |   |   | + | Yes |
| <i>flgE2</i>   |   |   |   | + | Yes |
| <i>flgR</i>    |   |   |   | + | Yes |
| <i>cj0073c</i> | + |   |   | - | Yes |
| <i>spoT</i>    | - |   |   | - | Yes |
| <i>cj1340c</i> |   | - |   | - | Yes |
| <i>maf7</i>    |   |   |   | - | Yes |
| <i>maf6</i>    |   |   |   | - | Yes |
| <i>fdxA</i>    |   |   |   | - | No  |
| <i>cj1345c</i> |   |   |   | - | No  |
| <i>trpF</i>    | + | + | + |   | Yes |
| <i>cj0309c</i> | + | + | + |   | Yes |
| <i>hypC</i>    | + | + |   |   | Yes |
| <i>cj1677</i>  | + |   | + |   | No  |
| <i>cj1623</i>  | + |   | + |   | Yes |
| <i>ccoQ</i>    | + |   | + |   | Yes |
| <i>cft</i>     | + |   |   |   | No  |
| <i>cj0034c</i> | + |   |   |   | No  |
| <i>cj1484c</i> | + |   |   |   | Yes |
| <i>cj1406c</i> | + |   |   |   | Yes |
| <i>cj1255</i>  | + |   |   |   | Yes |
| <i>cj1036c</i> | + |   |   |   | Yes |
| <i>ktrB</i>    | - | - | - |   | No  |
| <i>tonB1</i>   | - |   |   |   | Yes |
| <i>cfbpC</i>   | - |   |   |   | Yes |
| <i>cj1356c</i> |   | + | + |   | Yes |
| <i>cj0011c</i> |   | + | + |   | No  |
| <i>cj0900c</i> |   | + | + |   | Yes |
| <i>cj1211</i>  |   | + | - |   | No  |
| <i>cj0171</i>  |   | + |   |   | Yes |
| <i>hrcA</i>    |   | + |   |   | No  |
| <i>dnaK</i>    |   | + |   |   | No  |
| <i>cj0561c</i> |   | + |   |   | Yes |

---

|                            |   |   |     |
|----------------------------|---|---|-----|
| <i>flgM</i>                | + |   | Yes |
| <i>cj0367c</i>             | + |   | Yes |
| <i>cj1207c</i>             | + |   | Yes |
| <i>uvrC</i>                | - | - | No  |
| <i>rrc</i>                 |   | + | Yes |
| <i>cj1167</i>              |   | + | Yes |
| <i>cj0741</i>              |   | + | Yes |
| <i>acnB</i>                |   | + | Yes |
| <i>truB</i>                |   | - | Yes |
| <i>cj1343c<sup>e</sup></i> |   |   | No  |
| <i>dprA</i>                |   |   | Yes |
| <i>cj0949c</i>             |   |   | Yes |
| <i>acs</i>                 |   |   | Yes |
| <i>ceuB</i>                |   |   | Yes |
| <i>murE</i>                |   |   | No  |
| <i>cj1377c</i>             |   |   | Yes |
| <i>cj1375</i>              |   |   | No  |
| <i>cj0947c</i>             |   |   | Yes |
| <i>cj0494</i>              |   |   | Yes |
| <i>cj0977</i>              |   |   | Yes |
| <i>cj0044c</i>             |   |   | Yes |
| <i>cj1242</i>              |   |   | Yes |
| <i>cj1209</i>              |   |   | Yes |
| <i>cj0385c</i>             |   |   | Yes |
| <i>cj0020c</i>             |   |   | Yes |
| <i>cj0178</i>              |   |   | Yes |
| <i>cj0358</i>              |   |   | Yes |
| <i>motAB</i>               |   |   | Yes |

<sup>a</sup> Genes considered significantly differentially expressed with fold changes of at least 1.5 fold,  $p < 10^{-4}$ .

<sup>b</sup> microarray conditions: H<sub>2</sub>O<sub>2</sub>, hydrogen peroxide; CHP, cumene hydroperoxide; MND, menadione sodium bisulphite.

<sup>c</sup> '+' denotes gene is significantly upregulated.

<sup>d</sup> '-' denotes gene is significantly downregulated.

<sup>e</sup> Genes included in the mutant construction which were slightly below the cutoff threshold or of functional interest.

Table S4. Sensitivity of wild-type *C. jejuni*, isogenic deletion mutants and corresponding complemented strains to H<sub>2</sub>O<sub>2</sub>, cumene hydroperoxide or menadione bisulphite. The diameter of the zone of inhibition is represented as the mean clear zone ± standard error for each strain (in mm) after exposure to 10 µl of 3% H<sub>2</sub>O<sub>2</sub>, 3% cumene hydroperoxide, or 90 mM menadione bisulphite. Each experiment was repeated in quadruplicate. Values were considered significant (\*) at *P* < 0.001 using Bayesian statistical analysis.

| Strain                            | Oxidant <sup>a</sup>          |               |              |
|-----------------------------------|-------------------------------|---------------|--------------|
|                                   | H <sub>2</sub> O <sub>2</sub> | CHP           | MND          |
| <i>C. jejuni</i> NCTC11168        | 19.08 ± 0.19                  | 24.50 ± 0.22  | 31.63 ± 0.36 |
| Detoxification                    |                               |               |              |
| ΔCj0358                           | 16.44 ± 0.72*                 | 23.50 ± 0.53  | 29.63 ± 0.80 |
| ΔCj0358+Cj0358                    | 17.40 ± 0.40                  | 22.50 ± 0.52  | 31.93 ± 1.13 |
| Δrrc                              | 21.08 ± 1.08                  | 23.92 ± 1.08  | 34.50 ± 1.83 |
| Δrrc+rrc                          | 18.55 ± 0.38                  | 20.94 ± 0.67  | 32.27 ± 1.60 |
| Cation Transport/Binding Proteins |                               |               |              |
| ΔchaN                             | 17.37 ± 0.30                  | 21.47 ± 0.17* | 29.83 ± 0.61 |
| ΔchaN+chaN                        | 17.26 ± 0.75                  | 22.82 ± 0.66  | 34.08 ± 1.97 |
| ΔexbB1                            | 16.90 ± 0.31*                 | 23.13 ± 0.64  | 28.30 ± 0.58 |
| ΔexbB1+exbB1                      | 17.33 ± 0.60                  | 22.63 ± 0.37  | 32.90 ± 1.16 |
| ΔcfbpB                            | 19.30 ± 0.25                  | 25.33 ± 0.83  | 29.98 ± 1.52 |
| ΔexbB2                            | 18.20 ± 0.31                  | 24.37 ± 0.87  | 28.20 ± 0.50 |
| ΔexbB2+exbB2                      | 18.17 ± 0.17                  | 23.53 ± 0.44  | 30.90 ± 0.90 |
| ΔtonB3                            | 18.16 ± 0.76                  | 22.33 ± 0.58  | 28.83 ± 0.76 |
| ΔtonB1                            | 20.53 ± 0.17                  | 24.37 ± 0.07  | 31.07 ± 0.32 |
| ΔtonB1+ΔtonB2                     | 21.10 ± 0.44                  | 23.77 ± 0.67  | 33.27 ± 1.46 |
| ΔtonB2                            | 21.10 ± 0.46*                 | 26.47 ± 0.67  | 33.07 ± 1.39 |
| ΔtonB2+ΔtonB3                     | 19.83 ± 0.49                  | 24.20 ± 0.56  | 32.10 ± 1.33 |
| ΔceuB                             | 19.15 ± 0.17                  | 23.95 ± 0.45  | 31.60 ± 1.51 |
| ΔceuE                             | 18.77 ± 0.29                  | 22.90 ± 0.15  | 31.83 ± 0.61 |
| ΔcfrA                             | 19.40 ± 0.49                  | 23.57 ± 0.35  | 32.37 ± 0.30 |
| ΔcfbpC                            | 19.08 ± 0.27                  | 25.18 ± 0.64  | 30.50 ± 1.53 |
| ΔcfbpA                            | 19.13 ± 0.23                  | 24.33 ± 0.57  | 30.27 ± 0.54 |
| ΔchuA                             | 17.70 ± 0.67                  | 23.27 ± 0.43  | 31.47 ± 1.22 |
| ΔchuB                             | 20.13 ± 0.54                  | 23.58 ± 0.48  | 35.08 ± 1.20 |

|                              |               |              |               |
|------------------------------|---------------|--------------|---------------|
| $\Delta chuC$                | 19.33 ± 1.42  | 24.83 ± 0.85 | 34.29 ± 2.01  |
| $\Delta chuD$                | 18.88 ± 0.28  | 22.68 ± 0.50 | 34.30 ± 1.50  |
| $\Delta Cj0045c$             | 19.15 ± 0.09  | 24.25 ± 0.88 | 30.38 ± 1.43  |
| $\Delta Cj0178$              | 20.00 ± 0.25  | 25.17 ± 0.69 | 33.40 ± 0.83  |
| $\Delta exbD1$               | 18.23 ± 0.29  | 24.07 ± 0.79 | 28.57 ± 0.83  |
| $\Delta exbD2$               | 19.61 ± 0.97  | 22.33 ± 0.59 | 31.50 ± 0.66  |
| $\Delta chuZ$                | 20.30 ± 0.38  | 23.50 ± 0.17 | 34.90 ± 0.20  |
| $\Delta Cj1658$              | 19.10 ± 0.15  | 22.90 ± 0.20 | 32.17 ± 0.44  |
| $\Delta Cj1661$              | 19.10 ± 0.17  | 23.64 ± 0.76 | 33.00 ± 1.15  |
| $\Delta Cj1663$              | 17.83 ± 0.52  | 23.67 ± 0.74 | 28.67 ± 0.38  |
| $\Delta p19$                 | 19.67 ± 0.20  | 23.87 ± 0.47 | 32.67 ± 0.88  |
| $\Delta p19 + \Delta Cj1658$ | 20.43 ± 0.54  | 25.38 ± 0.95 | 33.93 ± 0.07  |
| <b>Energy Metabolism</b>     |               |              |               |
| $\Delta ald$                 | 17.70 ± 0.95  | 22.57 ± 0.23 | 32.07 ± 1.55  |
| $\Delta Cj0073c$             | 17.43 ± 0.23  | 22.33 ± 0.68 | 29.67 ± 1.67  |
| $\Delta Cj0073c + Cj0073c$   | 17.95 ± 0.65  | 23.43 ± 0.77 | 34.33 ± 1.92  |
| $\Delta Cj1377c$             | 20.70 ± 1.07  | 25.30 ± 0.56 | 35.57 ± 2.50  |
| $\Delta Cj1377c + Cj1377c$   | 17.93 ± 0.32  | 23.17 ± 0.42 | 32.83 ± 0.24  |
| $\Delta hypC$                | 19.40 ± 0.53  | 26.03 ± 0.92 | 33.03 ± 2.40  |
| $\Delta acnB$                | 21.22 ± 0.45* | 23.28 ± 0.24 | 36.28 ± 0.72  |
| $\Delta acnB + acnB$         | 20.27 ± 0.25  | 21.33 ± 0.44 | 33.44 ± 1.49  |
| $\Delta ccoQ$                | 17.83 ± 0.33  | 24.10 ± 0.91 | 28.97 ± 0.73  |
| $\Delta Cj1207c$             | 18.27 ± 0.27  | 24.73 ± 0.79 | 29.43 ± 0.47  |
| <b>Surface Structures</b>    |               |              |               |
| $\Delta flaG$                | 19.17 ± 0.53  | 26.08 ± 1.06 | 35.50 ± 1.53  |
| $\Delta flgD$                | 20.47 ± 0.47  | 26.27 ± 0.36 | 36.50 ± 0.31* |
| $\Delta flgD + flgD$         | 18.40 ± 0.31  | 23.60 ± 0.80 | 31.70 ± 0.58  |
| $\Delta flgE$                | 20.17 ± 1.29  | 24.93 ± 1.12 | 35.85 ± 1.35  |
| $\Delta flgE + flgE$         | 17.93 ± 0.37  | 22.53 ± 0.17 | 35.20 ± 1.05  |
| $\Delta flgE2$               | 19.64 ± 0.72  | 24.57 ± 0.62 | 33.75 ± 1.04  |
| $\Delta flgG$                | 20.28 ± 0.71  | 25.80 ± 0.40 | 34.50 ± 1.07  |
| $\Delta flgG2$               | 19.83 ± 1.07  | 25.63 ± 1.01 | 32.96 ± 1.31  |
| $\Delta flgH$                | 21.00 ± 0.42* | 26.55 ± 0.55 | 37.00 ± 1.30* |
| $\Delta flgH + flgH$         | 19.07 ± 0.37  | 23.37 ± 0.23 | 32.33 ± 1.19  |
| $\Delta flgI$                | 21.35 ± 0.43* | 26.00 ± 0.30 | 35.38 ± 1.89  |
| $\Delta flgI + flgI$         | 18.95 ± 0.34  | 23.95 ± 0.21 | 31.70 ± 1.13  |
| $\Delta flgK$                | 21.53 ± 0.13* | 26.13 ± 0.46 | 34.90 ± 2.04  |
| $\Delta flgK + flgK$         | 19.67 ± 0.17  | 24.73 ± 0.15 | 31.10 ± 0.49  |
| $\Delta flgL$                | 21.00 ± 0.23* | 25.08 ± 0.32 | 34.67 ± 1.73  |
| $\Delta flgL + flgL$         | 18.33 ± 1.17  | 21.25 ± 0.12 | 30.67 ± 0.10  |
| $\Delta flgM$                | 20.27 ± 0.50  | 24.33 ± 0.33 | 36.43 ± 1.40  |

|                                           |               |               |               |
|-------------------------------------------|---------------|---------------|---------------|
| <i>ΔflgM+flgM</i>                         | 19.27 ± 0.48  | 24.20 ± 0.67  | 32.93 ± 2.02  |
| <i>ΔflgP</i>                              | 21.63 ± 1.24* | 26.25 ± 0.86  | 35.25 ± 2.21  |
| <i>ΔflgP+flgP</i>                         | 19.94 ± 0.59  | 25.74 ± 0.62  | 33.08 ± 1.26  |
| <i>ΔflgR</i>                              | 20.47 ± 0.75  | 25.63 ± 0.34  | 36.78 ± 1.35* |
| <i>ΔflgR+flgR</i>                         | 17.90 ± 0.61  | 22.17 ± 0.35  | 32.83 ± 0.87  |
| <i>ΔflhB</i>                              | 19.80 ± 0.44  | 23.18 ± 0.32  | 36.53 ± 1.86* |
| <i>ΔflhB+flhB</i>                         | 18.18 ± 0.76  | 20.86 ± 0.82  | 32.15 ± 0.99  |
| <i>ΔfliK</i>                              | 20.43 ± 0.11  | 26.20 ± 0.45  | 35.95 ± 1.86  |
| <i>ΔfliK+fliK</i>                         | 17.83 ± 0.17  | 22.73 ± 0.62  | 32.67 ± 0.52  |
| <i>Δmaf4</i>                              | 18.97 ± 0.33  | 22.63 ± 0.35  | 29.77 ± 0.91  |
| <i>Δmaf6</i>                              | 18.40 ± 0.15  | 22.87 ± 0.17  | 30.93 ± 0.41  |
| <i>Δmaf7</i>                              | 19.50 ± 0.50  | 23.03 ± 0.15  | 29.90 ± 1.17  |
| <i>ΔpseB</i>                              | 20.50 ± 0.32  | 25.92 ± 0.53  | 35.95 ± 1.40* |
| <i>ΔpseB+pseB</i>                         | 18.95 ± 1.13  | 23.67 ± 1.20  | 26.94 ± 2.96  |
| <b>Drug Efflux</b>                        |               |               |               |
| <i>ΔCj0309c</i>                           | 19.71 ± 0.95  | 25.05 ± 0.51  | 34.53 ± 1.41  |
| <i>ΔcmeA</i>                              | 20.79 ± 0.85  | 25.60 ± 1.26  | 34.58 ± 1.15  |
| <b>Membranes, Lipoproteins and Porins</b> |               |               |               |
| <i>ΔCj0385c</i>                           | 19.07 ± 0.32  | 23.30 ± 0.21  | 30.67 ± 0.67  |
| <i>ΔCj0587</i>                            | 18.93 ± 0.13  | 23.73 ± 1.02  | 30.03 ± 0.15  |
| <i>ΔCj0818</i>                            | 19.40 ± 0.21  | 23.63 ± 0.81  | 29.73 ± 0.72  |
| <i>ΔCj1211</i>                            | 20.27 ± 0.26  | 22.93 ± 0.30  | 34.27 ± 1.43  |
| <i>ΔCj1356c</i>                           | 20.35 ± 0.96  | 23.55 ± 0.63  | 33.03 ± 1.44  |
| <i>ΔCj1484c</i>                           | 20.60 ± 0.50  | 25.67 ± 0.57  | 32.17 ± 1.66  |
| <b>Hypothetical Unknown Proteins</b>      |               |               |               |
| <i>ΔCj0040</i>                            | 18.98 ± 0.79  | 25.93 ± 0.64  | 34.55 ± 1.63  |
| <i>ΔCj0044c</i>                           | 19.17 ± 0.44  | 22.80 ± 0.38  | 32.53 ± 0.77  |
| <i>ΔCj0148c</i>                           | 18.90 ± 0.30  | 22.50 ± 0.40  | 33.57 ± 0.72  |
| <i>ΔCj0171</i>                            | 19.92 ± 1.28  | 25.17 ± 1.16  | 34.00 ± 1.75  |
| <i>ΔCj0202c</i>                           | 18.77 ± 0.37  | 22.27 ± 0.32  | 31.53 ± 0.62  |
| <i>ΔCj0202c+Cj0202c</i>                   | 17.77 ± 0.39  | 23.60 ± 0.55  | 31.10 ± 1.46  |
| <i>ΔCj0253</i>                            | 18.88 ± 1.31  | 25.00 ± 0.85  | 36.04 ± 1.76  |
| <i>ΔCj0260c</i>                           | 17.42 ± 0.19  | 21.67 ± 0.44* | 30.87 ± 0.75  |
| <i>ΔCj0260c+Cj0260c</i>                   | 17.50 ± 0.35  | 22.83 ± 0.57  | 30.85 ± 0.35  |
| <i>ΔCj0344</i>                            | 20.92 ± 0.14* | 23.92 ± 0.45  | 33.33 ± 1.01  |
| <i>ΔCj0344+Cj0344</i>                     | 18.12 ± 0.73  | 21.25 ± 1.24  | 30.36 ± 1.33  |
| <i>ΔCj0416</i>                            | 18.30 ± 0.60  | 23.47 ± 1.30  | 32.00 ± 0.93  |
| <i>ΔCj0524</i>                            | 20.53 ± 0.48  | 24.03 ± 0.72  | 32.18 ± 0.76  |
| <i>ΔCj0554</i>                            | 18.57 ± 0.23  | 23.07 ± 0.75  | 34.07 ± 0.41  |
| <i>ΔCj0741</i>                            | 17.80 ± 0.27  | 22.40 ± 0.62  | 28.90 ± 0.59  |

|                          |                   |                   |                   |
|--------------------------|-------------------|-------------------|-------------------|
| $\Delta$ Cj0786          | 18.27 $\pm$ 0.15  | 23.23 $\pm$ 0.65  | 31.30 $\pm$ 0.56  |
| $\Delta$ Cj0814          | 17.27 $\pm$ 0.54  | 23.90 $\pm$ 0.35  | 29.33 $\pm$ 1.07  |
| $\Delta$ Cj0814+Cj0814   | 17.64 $\pm$ 0.39  | 23.80 $\pm$ 0.34  | 33.38 $\pm$ 1.62  |
| $\Delta$ Cj0819          | 19.03 $\pm$ 0.10  | 23.50 $\pm$ 0.87  | 31.33 $\pm$ 0.46  |
| $\Delta$ Cj0900c         | 19.17 $\pm$ 0.40  | 22.08 $\pm$ 0.45  | 30.92 $\pm$ 0.99  |
| $\Delta$ Cj0977          | 19.77 $\pm$ 0.35  | 22.50 $\pm$ 0.28  | 34.00 $\pm$ 1.00  |
| $\Delta$ Cj1159c         | 19.71 $\pm$ 0.90  | 22.25 $\pm$ 0.40* | 30.42 $\pm$ 0.72  |
| $\Delta$ Cj1209          | 20.60 $\pm$ 0.40  | 24.17 $\pm$ 0.19  | 36.00 $\pm$ 1.08  |
| $\Delta$ Cj1242          | 19.77 $\pm$ 0.33  | 22.73 $\pm$ 0.03  | 32.63 $\pm$ 0.67  |
| $\Delta$ Cj1383c         | 20.30 $\pm$ 0.40  | 23.30 $\pm$ 0.45  | 30.73 $\pm$ 0.66  |
| $\Delta$ Cj1383c+Cj1383c | 18.44 $\pm$ 0.51  | 21.11 $\pm$ 0.19  | 31.61 $\pm$ 1.42  |
| $\Delta$ mdaB            | 18.40 $\pm$ 1.02  | 26.43 $\pm$ 0.43  | 33.00 $\pm$ 1.62  |
| Miscellaneous            |                   |                   |                   |
| $\Delta$ Cj0062c         | 21.73 $\pm$ 0.21* | 26.00 $\pm$ 0.39  | 35.67 $\pm$ 0.33  |
| $\Delta$ Cj0062c+Cj0062c | 19.44 $\pm$ 0.39  | 25.20 $\pm$ 0.50  | 33.63 $\pm$ 1.80  |
| $\Delta$ Cj0295          | 19.10 $\pm$ 0.31  | 23.80 $\pm$ 0.31  | 34.10 $\pm$ 0.76  |
| $\Delta$ Cj0947c         | 23.94 $\pm$ 1.20* | 26.44 $\pm$ 0.80  | 43.00 $\pm$ 3.76* |
| $\Delta$ Cj0947c+Cj0947c | 20.66 $\pm$ 1.50  | 25.55 $\pm$ 0.50  | 32.33 $\pm$ 0.19  |
| $\Delta$ Cj1036c         | 19.17 $\pm$ 0.20  | 22.27 $\pm$ 0.26  | 30.53 $\pm$ 0.50  |
| $\Delta$ Cj1036c+Cj1036c | 18.73 $\pm$ 0.48  | 23.83 $\pm$ 0.48  | 33.83 $\pm$ 1.91  |
| $\Delta$ Cj1388          | 21.17 $\pm$ 0.41* | 25.38 $\pm$ 0.61  | 35.33 $\pm$ 2.20  |
| $\Delta$ Cj1623          | 18.33 $\pm$ 0.50  | 21.95 $\pm$ 0.19* | 34.78 $\pm$ 2.50  |
| $\Delta$ Cj1623+Cj1623   | 17.44 $\pm$ 0.49  | 22.70 $\pm$ 0.39  | 32.63 $\pm$ 1.44  |
| $\Delta$ folP            | 19.06 $\pm$ 0.36  | 22.11 $\pm$ 0.39  | 33.39 $\pm$ 0.25  |
| $\Delta$ pstC            | 20.75 $\pm$ 0.31* | 27.25 $\pm$ 1.00* | 32.33 $\pm$ 1.24  |
| $\Delta$ pstC+pstC       | 20.60 $\pm$ 0.25* | 25.30 $\pm$ 0.41  | 36.84 $\pm$ 1.79  |
| $\Delta$ spoT            | 20.07 $\pm$ 0.41  | 25.00 $\pm$ 0.17  | 33.83 $\pm$ 1.04  |
| $\Delta$ trpF            | 20.04 $\pm$ 0.68  | 25.67 $\pm$ 0.96  | 34.94 $\pm$ 2.24  |
| $\Delta$ trpF+trpF       | 18.77 $\pm$ 0.45  | 23.85 $\pm$ 0.34  | 32.72 $\pm$ 1.07  |
| $\Delta$ truB            | 19.43 $\pm$ 0.49  | 25.37 $\pm$ 0.36  | 34.00 $\pm$ 1.31  |
| $\Delta$ acs             | 19.12 $\pm$ 0.24  | 23.89 $\pm$ 0.27  | 33.74 $\pm$ 1.12  |
| $\Delta$ Cj0494          | 20.47 $\pm$ 0.15  | 24.83 $\pm$ 0.71  | 31.47 $\pm$ 1.36  |
| $\Delta$ Cj0561c         | 18.63 $\pm$ 0.23  | 22.65 $\pm$ 0.60  | 30.08 $\pm$ 0.43  |
| $\Delta$ Cj0672          | 18.60 $\pm$ 0.29  | 22.93 $\pm$ 0.63  | 30.33 $\pm$ 1.02  |
| $\Delta$ Cj0949c         | 20.57 $\pm$ 0.41  | 23.57 $\pm$ 0.19  | 33.90 $\pm$ 0.90  |
| $\Delta$ Cj1167          | 18.40 $\pm$ 0.70  | 23.10 $\pm$ 0.40  | 33.07 $\pm$ 1.18  |
| $\Delta$ Cj1241          | 19.30 $\pm$ 0.38  | 24.65 $\pm$ 0.65  | 30.08 $\pm$ 0.82  |
| $\Delta$ Cj1255          | 19.33 $\pm$ 0.84  | 25.35 $\pm$ 1.30  | 33.38 $\pm$ 1.81  |
| $\Delta$ Cj1340c         | 18.80 $\pm$ 0.67  | 22.77 $\pm$ 0.32  | 29.43 $\pm$ 0.81  |
| $\Delta$ Cj1406c         | 19.60 $\pm$ 0.20  | 22.43 $\pm$ 0.30  | 35.33 $\pm$ 1.70  |
| $\Delta$ dprA            | 18.70 $\pm$ 0.49  | 24.77 $\pm$ 0.82  | 28.83 $\pm$ 0.49  |

<sup>a</sup> H<sub>2</sub>O<sub>2</sub>, hydrogen peroxide; CHP, cumene hydroperoxide; MND, menadione

Table S5. Sensitivity of wild-type *C. jejuni*, isogenic single and double deletion mutants to H<sub>2</sub>O<sub>2</sub>, cumene hydroperoxide or menadione bisulphite in the presence of 20 mM sodium fumarate. The diameter of the zone of inhibition is represented as the mean clear zone ± standard error for each strain (in mm) after exposure to 10 µl of 3% H<sub>2</sub>O<sub>2</sub>, 3% cumene hydroperoxide, or 90 mM menadione bisulphite. Each experiment was repeated in at least quadruplicate. Values were considered significant (\*) at *P* < 0.05 using one way ANOVA.

| Strain                        | Fumarate | H <sub>2</sub> O <sub>2</sub> | Oxidant <sup>a</sup> | MND           |
|-------------------------------|----------|-------------------------------|----------------------|---------------|
|                               | (+/-)    |                               | CHP                  |               |
| <i>C. jejuni</i> NCTC11168    | -        | 18.34 ± 0.32                  | 23.33 ± 0.20         | 26.59 ± 0.41  |
| <i>C. jejuni</i> NCTC11168    | +        | 19.00 ± 0.26                  | 23.25 ± 0.24         | 25.99 ± 0.61  |
| Detoxification                |          |                               |                      |               |
| Δ <i>sodB</i>                 | -        | 22.24 ± 0.29*                 | nd                   | 34.00 ± 0.70* |
| Δ <i>sodB</i>                 | +        | 22.41 ± 0.11*                 | nd                   | 33.38 ± 0.55* |
| Surface Structures            |          |                               |                      |               |
| Δ <i>flgD</i>                 | -        | 20.54 ± 0.40*                 | 24.99 ± 0.82*        | 33.27 ± 1.56* |
| Δ <i>flgD</i>                 | +        | nd                            | nd                   | 28.83 ± 1.26  |
| Δ <i>flgD</i> Δ <i>ccoQ</i>   | -        | 19.30 ± 0.35                  | 23.43 ± 0.35         | 26.23 ± 0.63  |
| Δ <i>flgH</i>                 | -        | 20.50 ± 0.25*                 | 25.57 ± 0.19*        | 29.81 ± 0.41* |
| Δ <i>flgH</i>                 | +        | 20.30 ± 0.22*                 | 25.23 ± 0.24*        | 26.43 ± 0.77  |
| Δ <i>flgH</i> Δ <i>ccoQ</i>   | -        | 21.30 ± 0.52*                 | 25.00 ± 0.34*        | 24.00 ± 0.52  |
| Δ <i>flgP</i>                 | -        | 21.50 ± 0.97*                 | 25.21 ± 0.23*        | 28.88 ± 0.66  |
| Δ <i>flgP</i>                 | +        | 21.08 ± 1.25*                 | 25.50 ± 0.83*        | 26.89 ± 0.31  |
| Δ <i>flhB</i>                 | -        | 20.63 ± 0.23*                 | 23.30 ± 0.14         | 28.94 ± 0.45* |
| Δ <i>flhB</i>                 | +        | 20.47 ± 0.22*                 | 23.33 ± 0.17         | 26.21 ± 0.66  |
| Δ <i>flhB</i> Δ <i>ccoQ</i>   | -        | 20.60 ± 0.27*                 | 22.33 ± 0.20         | 23.36 ± 1.05* |
| Δ <i>maf7</i>                 | -        | 21.91 ± 0.75*                 | 24.16 ± 0.83         | 28.46 ± 0.53  |
| Δ <i>maf7</i>                 | +        | 21.25 ± 0.92*                 | 23.92 ± 0.58         | 27.79 ± 0.56  |
| Δ <i>motAB</i>                | -        | 20.80 ± 0.12*                 | 24.76 ± 0.09*        | 30.02 ± 0.92* |
| Δ <i>motAB</i>                | +        | 20.54 ± 0.18*                 | 24.50 ± 0.10         | 24.17 ± 0.67  |
| Δ <i>motAB</i> Δ <i>ccoQ</i>  | -        | 19.92 ± 0.17                  | 24.58 ± 0.28         | 24.04 ± 0.22  |
| Δ <i>motAB</i> + <i>motAB</i> | -        | 17.87 ± 0.27                  | 22.55 ± 0.21         | 29.12 ± 0.30* |

|                    |   |                  |                  |                  |
|--------------------|---|------------------|------------------|------------------|
| $\Delta ccoQ::kan$ | - | $19.22 \pm 0.34$ | $23.44 \pm 0.38$ | $25.38 \pm 0.59$ |
|--------------------|---|------------------|------------------|------------------|

<sup>a</sup> H<sub>2</sub>O<sub>2</sub>, hydrogen peroxide; CHP, cumene hydroperoxide; MND, menadione

Nd, not determined

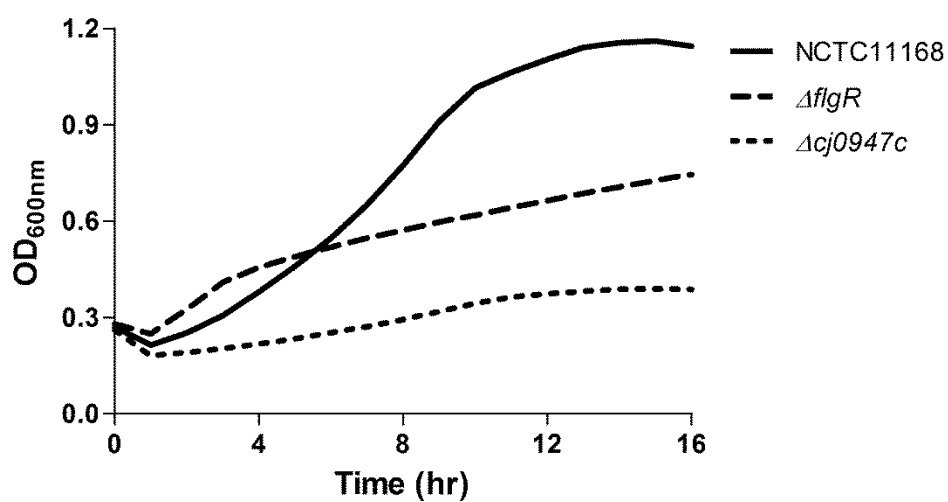

Figure S1. Growth of *C. jejuni* NCTC11168,  $\Delta flgR$ , and  $\Delta cj0947c$  in MH media over 16 hours. OD<sub>600nm</sub> readings were taken every 15 min using a 96 well plate reader with continual shaking at 37 °C.



## References

1. **Naikare H, Butcher J, Flint A, Xu J, Raymond K, Stintzi A.** 2013. *C. jejuni* ferric-enterobactin receptor CfrA is TonB3 dependent and mediates iron acquisition from structurally diverse catechol siderophores. *Metalomics* **Submitted**.
2. **Palyada K, Threadgill D, Stintzi A.** 2004. Iron acquisition and regulation in *Campylobacter jejuni*. *J Bacteriol* **186**:4714-4729.
3. **Stintzi A, Marlow D, Palyada K, Naikare H, Panciera R, Whitworth L, Clarke C.** 2005. Use of genome-wide expression profiling and mutagenesis to study the intestinal lifestyle of *Campylobacter jejuni*. *Infect Immun* **73**:1797-1810.
4. **Ridley KA, Rock JD, Li Y, Ketley JM.** 2006. Heme utilization in *Campylobacter jejuni*. *J Bacteriol* **188**:7862-7875.
5. **Yao R, Alm RA, Trust TJ, Guerry P.** 1993. Construction of new *Campylobacter* cloning vectors and a new mutational cat cassette. *Gene* **130**:127-130.
6. **Reid AN, Pandey R, Palyada K, Naikare H, Stintzi A.** 2008. Identification of *Campylobacter jejuni* genes involved in the response to acidic pH and stomach transit. *Appl Environ Microbiol* **74**:1583-1597.
